# Supplementary material
Source: Royal Society of Chemistry journal article supplement (doi:10.1039/d5an00347d)
Supplement: d5an00347d1.pdf [file d5an00347d1.pdf]

**Supplementary Information**

**Hydropyrolysis: towards fluorescence-free Raman spectroscopy analysis of internal diesel injector deposits**

Joel Viggars,<sup>a</sup> Sarah Angel-Smith,<sup>a</sup> Graham A. Rance,<sup>b,c</sup> Ahmed Khairy,<sup>a,d</sup> Will Meredith,<sup>a</sup> Adrienne Davies,<sup>b</sup> Jim Barker,<sup>e\*</sup> Jaqueline Reid,<sup>e</sup> David J. Scurr<sup>f</sup> and Colin E. Snape<sup>a</sup>

a. Faculty of Engineering, University of Nottingham, Energy Technologies Building, Innovation Park, Jubilee Campus, Triumph Road, Nottingham NG7 2TU, UK

b. School of Chemistry, University of Nottingham, University Park, Nottingham, NG7 2RD, UK

c. Nanoscale and Microscale Research Centre (nmRC), University of Nottingham, University Park, Nottingham, NG7 2RD, UK

d. Geology Department, Faculty of Science, South Valley University, Qena, 83523, Egypt

e. Innospec Ltd, Manufacturing Park/Oil Sites Rd, Ellesmere Port, CH65 4EY, UK

f. Laboratory of Pharmacy, University of Nottingham, Nottingham NG7 2RD, UK

\* Corresponding author e-mail: [jim.barker@innospecinc.com](mailto:jim.barker@innospecinc.com)

## S1. The effect of laser power on the Raman spectra of the reference carbons

### Experiment:

A Raman spectrum at a single fixed location was acquired at  $P = 0.4, 4.0, 10.0, 20.0$  and  $40.0$  mW for each of the six reference carbons. The acquisition time per spectrum was scaled to laser power, i.e., 60.0, 6.0, 2.4, 1.2 and 0.6 s for  $P = 0.4, 4.0, 10.0, 20.0$  and  $40.0$  mW, respectively.

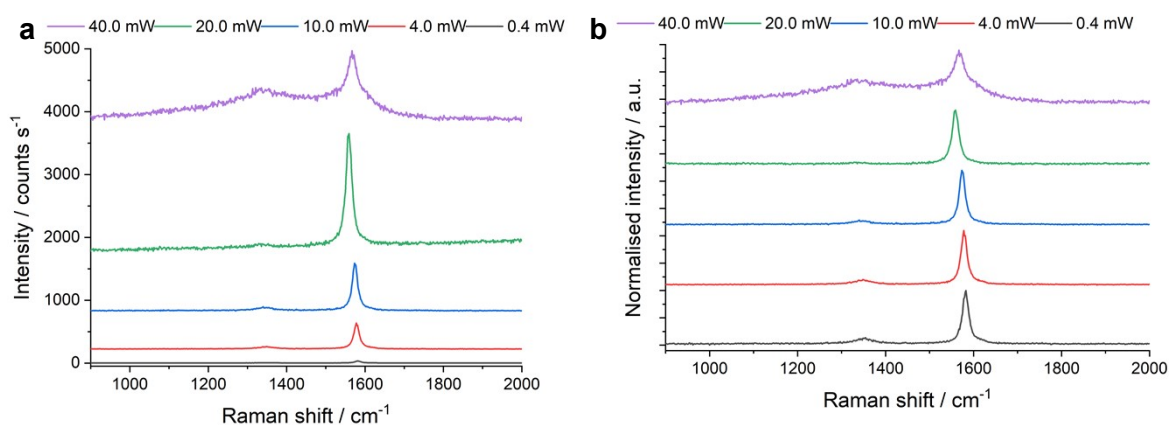

**Figure S1.** The effect of laser power ( $P = 0.4$ – $10.0$  mW) on the Raman spectrum ( $\lambda = 532$  nm) of graphite. The spectra presented in (a) have not been processed and in (b) have been processed as described in the Experimental section. Here,  $I_{base} = 1.6, 12.1, 24.3, 312.0$  and  $215.9$  counts  $s^{-1}$  at  $P = 0.4, 4.0, 10.0, 20.0$  and  $40.0$  mW, respectively.

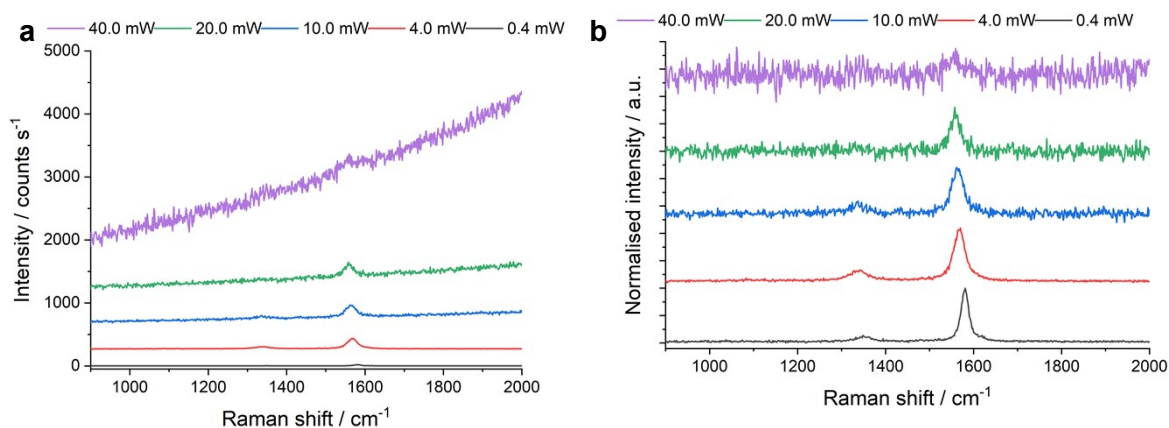

**Figure S2.** The effect of laser power ( $P = 0.4$ – $10.0$  mW) on the Raman spectrum ( $\lambda = 532$  nm) of MWCNT. The spectra presented in (a) have not been processed and in (b) have been processed as

described in the Experimental section. Here,  $I_{\text{base}} = 1.5, 15.3, 265.1, 591.1$  and  $3977.6$  counts  $\text{s}^{-1}$  at  $P = 0.4, 4.0, 10.0, 20.0$  and  $40.0$  mW, respectively.

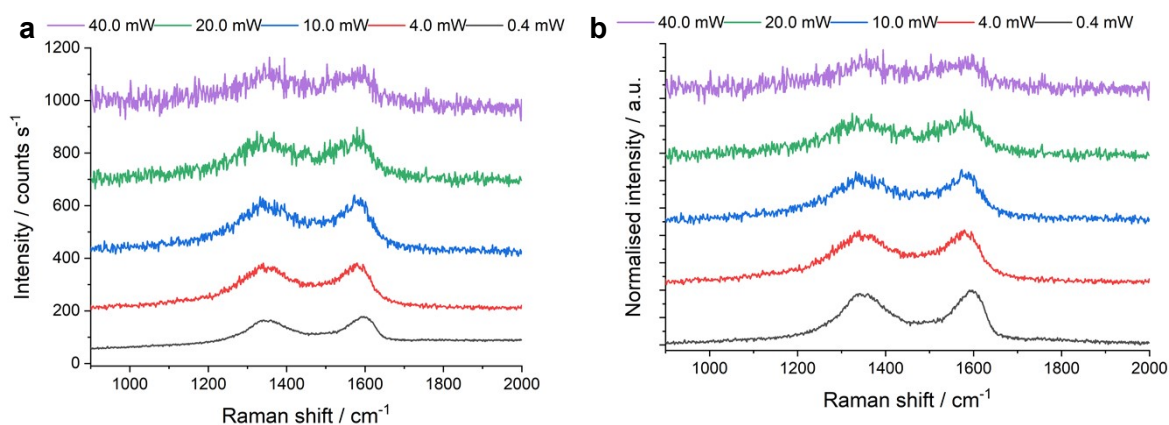

**Figure S3.** The effect of laser power ( $P = 0.4$ – $10.0$  mW) on the Raman spectrum ( $\lambda = 532$  nm) of GO. The sample was photobleached for 100 s at  $p = 0.4$  mW prior to spectrum acquisition to suppress some of the observed fluorescence. The spectra presented in (a) have not been processed and in (b) have been processed as described in the Experimental section. Here,  $I_{\text{base}} = 85.0, 66.5, 109.1, 157.6$  and  $151.2$  counts  $\text{s}^{-1}$  at  $P = 0.4, 4.0, 10.0, 20.0$  and  $40.0$  mW, respectively.

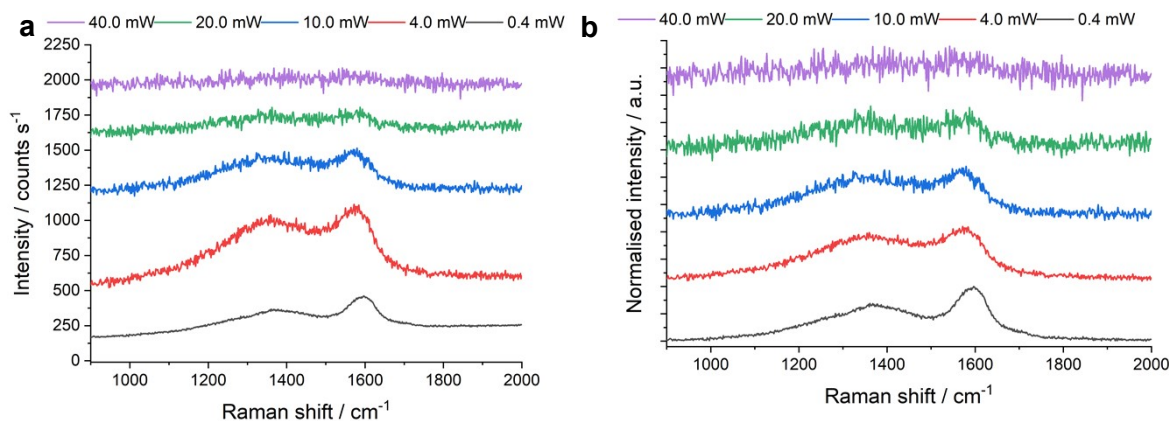

**Figure S4.** The effect of laser power ( $P = 0.4$ – $10.0$  mW) on the Raman spectrum ( $\lambda = 532$  nm) of charcoal. The spectra presented in (a) have not been processed and in (b) have been processed as described in the Experimental section. Here,  $I_{\text{base}} = 252.8, 579.6, 330.4, 291.5$  and  $211.6$   $\text{s}^{-1}$  at  $P = 0.4, 4.0, 10.0, 20.0$  and  $40.0$  mW, respectively.

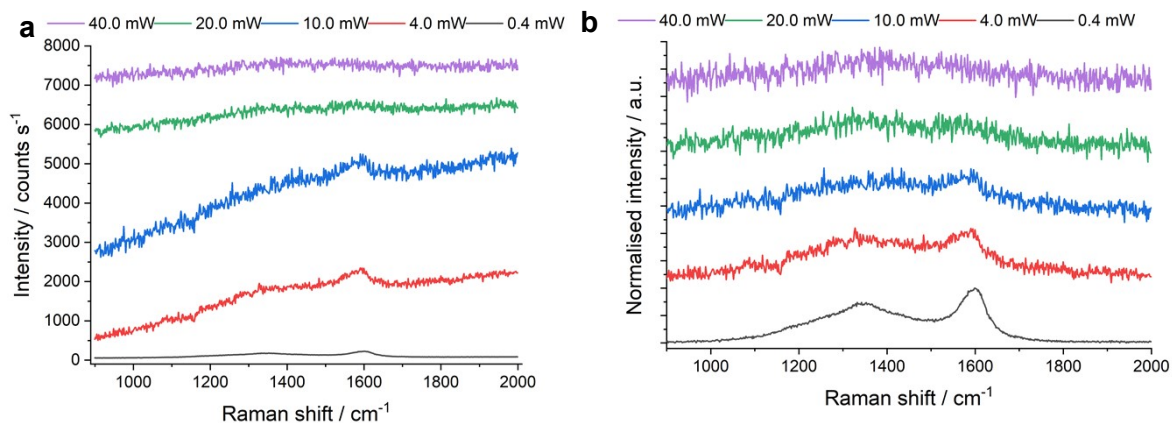

**Figure S5.** The effect of laser power ( $P = 0.4\text{--}10.0$  mW) on the Raman spectrum ( $\lambda = 532$  nm) of Biochar-A. The spectra presented in (a) have not been processed and in (b) have been processed as described in the Experimental section. Here,  $I_{\text{base}} = 82.1, 7813.1, 12477.0, 3681.8$  and  $2276.0$  counts  $\text{s}^{-1}$  at  $P = 0.4, 4.0, 10.0, 20.0$  and  $40.0$  mW, respectively.

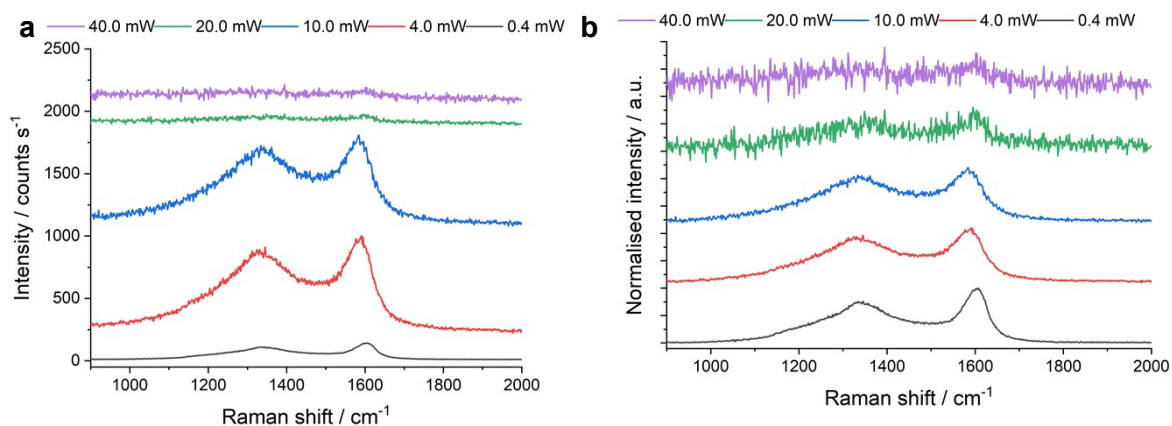

**Figure S6.** The effect of laser power ( $P = 0.4\text{--}10.0$  mW) on the Raman spectrum ( $\lambda = 532$  nm) of Biochar-B. The spectra presented in (a) have not been processed and in (b) have been processed as described in the Experimental section. Here,  $I_{\text{base}} = 10.9, 152.0, 160.9, 49.7$  and  $103.7$  counts  $\text{s}^{-1}$  at  $P = 0.4, 4.0, 10.0, 20.0$  and  $40.0$  mW, respectively.

### Conclusions:

In general, where the laser power exceeds  $0.4$  mW, the following spectral changes are observed: (i) a shift in the position of the G band to lower Raman shift, consistent with laser-induced heating; (ii) a change in  $I_{\text{D}}:I_{\text{G}}$ , reflecting structural ordering of the carbon in response to laser heating; and (iii) a variable change in baseline intensity.

At higher laser powers, more dramatic spectral changes are seen, including broadening of all bands, increases in the baseline intensity, and, in the extreme cases, near total loss of signal,

indicative of further photothermal transformation and ultimately combustion of the carbons.

Comparing the six samples, it appears that more ordered carbons (e.g., graphite and MWCNT) have a higher threshold for laser-promoted heating and subsequent photothermally-induced restructuring than more disordered carbons (e.g., GO, charcoal and the two Biochars).

## S2. The effect of laser wavelength on the Raman spectra of the reference carbons

### Experiment:

A Raman spectrum ( $P \leq 0.4$  mW) was acquired at  $\lambda = 325, 532, 660$  and  $785$  nm from 3-5 random locations for each of the six reference carbons.

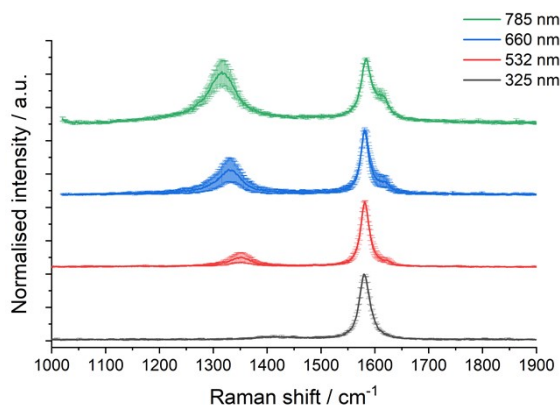

**Figure S7.** The effect of laser wavelength ( $\lambda = 325, 532, 660$  and  $785$  nm) on the Raman spectra ( $P \leq 0.4$  mW) of graphite. The spectra presented are the mean with error bars reflecting one standard deviation from  $N=5$  measurements for  $\lambda = 532$  nm and  $N = 3$  measurements for  $\lambda = 325, 660$  and  $785$  nm. Each spectrum was processed according to the description in the Experimental section.

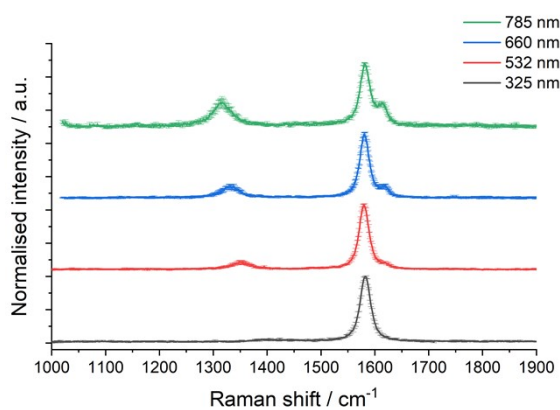

**Figure S8.** The effect of laser wavelength ( $\lambda = 325, 532, 660$  and  $785$  nm) on the Raman spectra ( $P \leq 0.4$  mW) of MWCNT. The spectra presented are the mean with error bars reflecting one standard deviation from  $N=5$  measurements for  $\lambda = 532$  nm and  $N = 3$  measurements for  $\lambda = 325, 660$  and  $785$  nm. Each spectrum was processed according to the description in the Experimental section.

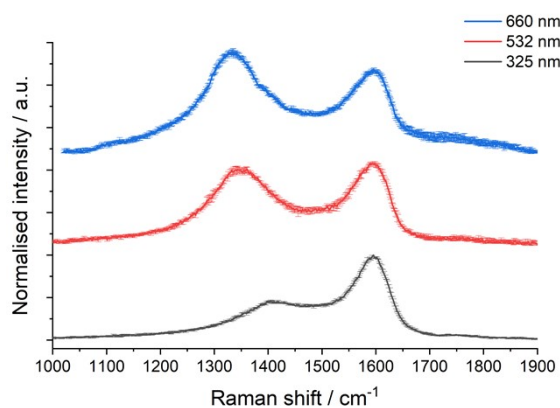

**Figure S9.** The effect of laser wavelength ( $\lambda = 325, 532$  and  $660$  nm) on the Raman spectra ( $P \leq 0.4$  mW) of GO. For spectra obtained at  $\lambda = 532$  and  $660$  nm, the sample was photobleached for 100 s at  $P = 0.4$  and  $0.25$  mW, respectively, prior to acquisition to suppress some of the observed fluorescence. It was not possible to record Raman spectra at  $\lambda = 785$  nm due to dominant fluorescence. The spectra presented are the mean with error bars reflecting one standard deviation from  $N=5$  measurements for  $\lambda = 532$  nm and  $N = 3$  measurements for  $\lambda = 325$  and  $660$  nm. Each spectrum was processed according to the description in the Experimental section.

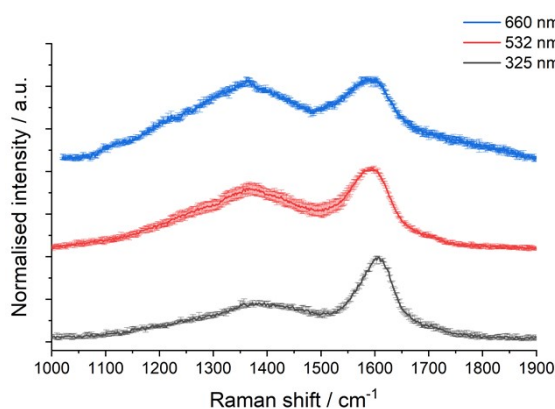

**Figure S10.** The effect of laser wavelength ( $\lambda = 325, 532,$  and  $660$  nm) on the Raman spectra ( $P \leq 0.4$  mW) of charcoal. For spectra obtained at  $\lambda = 660$  nm, the sample was photobleached for 100 s at  $P = 0.25$  mW prior to acquisition to suppress some of the observed fluorescence. It was not possible to record Raman spectra at  $\lambda = 785$  nm due to dominant fluorescence. The spectra presented are the mean with error bars reflecting one standard deviation from  $N=5$  measurements for  $\lambda = 532$  nm and  $N = 3$  measurements for  $\lambda = 325$  and  $660$  nm. Each spectrum was processed according to the description in the Experimental section.

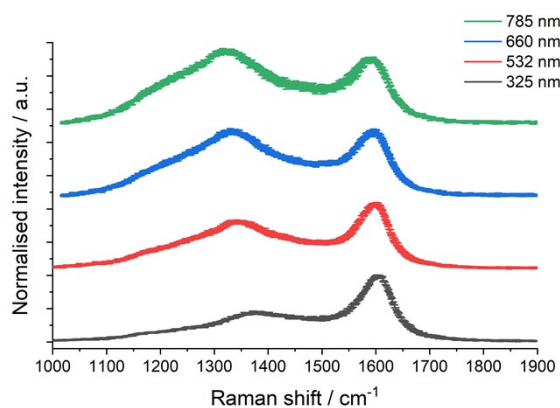

**Figure S11.** The effect of laser wavelength ( $\lambda = 325, 532, 660$  and  $785$  nm) on the Raman spectra ( $P \leq 0.4$  mW) of Biochar-A. The spectra presented are the mean with error bars reflecting one standard deviation from  $N=5$  measurements for  $\lambda = 532$  nm and  $N = 3$  measurements for  $\lambda = 325, 660$  and  $785$  nm. Each spectrum was processed according to the description in the Experimental section.

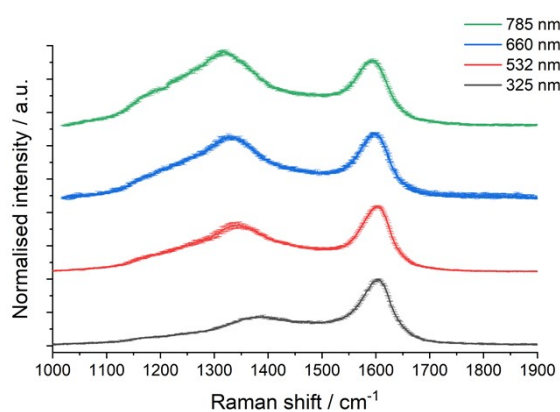

**Figure S12.** The effect of laser wavelength ( $\lambda = 325, 532, 660$  and  $785$  nm) on the Raman spectra ( $P \leq 0.4$  mW) of Biochar-B. The spectra presented are the mean with error bars reflecting one standard deviation from  $N=5$  measurements for  $\lambda = 532$  nm and  $N = 3$  measurements for  $\lambda = 325, 660$  and  $785$  nm. Each spectrum was processed according to the description in the Experimental section.

**Table S1.** Spectral characteristics extracted using the peak limits method from the point spectra ( $\lambda = 325, 532, 660$  and  $785$  nm) of the reference carbons investigated in this study by  $\mu$ RS before treatment. Values are quoted as mean plus/minus one standard deviation from  $N=5$  measurements for  $\lambda = 532$  nm and  $N = 3$  measurements for  $\lambda = 325, 660$  and  $785$  nm.

| Reference carbon | $\lambda$ / nm | $I_{\text{base}}$ / counts s <sup>-1</sup> | D band                      |                          | G band                      |                          | $I_D:I_G$      |
|------------------|----------------|--------------------------------------------|-----------------------------|--------------------------|-----------------------------|--------------------------|----------------|
|                  |                |                                            | Position / cm <sup>-1</sup> | Width / cm <sup>-1</sup> | Position / cm <sup>-1</sup> | Width / cm <sup>-1</sup> |                |
| Graphite         | 325            | 9.7<br>± 0.8                               | 1417.0<br>± 16.5            | 107.1<br>± 25.7          | 1579.8<br>± 0.0             | 26.5<br>± 0.0            | 0.07<br>± 0.01 |
|                  | 532            | 1.8<br>± 0.1                               | 1351.9<br>± 2.6             | 52.0<br>± 3.7            | 1581.3<br>± 1.3             | 21.4<br>± 2.5            | 0.17<br>± 0.07 |
|                  | 660            | 0.8<br>± 0.1                               | 1328.9<br>± 1.3             | 58.4<br>± 3.9            | 1581.3<br>± 1.3             | 23.5<br>± 5.5            | 0.41<br>± 0.19 |
|                  | 785            | 1.3<br>± 0.2                               | 1316.9<br>± 2.3             | 71.2<br>± 8.5            | 1584.2<br>± 0.0             | 37.5<br>± 11.6           | 0.80<br>± 20   |
| MWCNT            | 325            | 11.0<br>± 1.0                              | 1441.3<br>± 52.2            | 55.8<br>± 41.9           | 1583.3<br>± 1.3             | 26.5<br>± 2.2            | 0.06<br>± 0.01 |
|                  | 532            | 1.6<br>± 0.1                               | 1350.3<br>± 2.6             | 45.6<br>± 7.3            | 1579.4<br>± 1.5             | 23.3<br>± 1.5            | 0.14<br>± 0.03 |
|                  | 660            | 0.7<br>± 0.1                               | 1329.4<br>± 3.4             | 49.4<br>± 2.2            | 1580.3<br>± 1.3             | 25.0<br>± 1.3            | 0.19<br>± 0.04 |
|                  | 785            | 0.9<br>± 0.0                               | 1314.5<br>± 3.9             | 46.0<br>± 3.4            | 1582.5<br>± 1.3             | 27.2<br>± 1.3            | 0.42<br>± 0.07 |
| GO               | 325            | 9.6<br>± 0.1                               | 1400.7<br>± 3.4             | 169.7<br>± 4.5           | 1595.3<br>± 0.0             | 94.9<br>± 3.8            | 0.46<br>± 0.01 |
|                  | 532            | 92.6 ±<br>49.3 <sup>a</sup>                | 1348.0<br>± 10.0            | 163.0<br>± 14.2          | 1593.1<br>± 3.2             | 103.5<br>± 6.5           | 0.93<br>± 0.03 |
|                  | 660            | 219.3 ±<br>119.1 <sup>a</sup>              | 1332.7<br>± 3.9             | 155.6<br>± 4.7           | 1596.0<br>± 1.3             | 125.1<br>± 2.6           | 1.22<br>± 0.04 |
|                  | 785            | - <sup>b</sup>                             | - <sup>b</sup>              | - <sup>b</sup>           | - <sup>b</sup>              | - <sup>b</sup>           | - <sup>b</sup> |
| Charcoal         | 325            | 22.3<br>± 3.8                              | 1377.3<br>± 19.1            | 249.4<br>± 17.3          | 1605.3<br>± 3.4             | 89.6<br>± 4.6            | 0.48<br>± 0.03 |
|                  | 532            | 311.8 ±<br>106.5                           | 1367.8<br>± 6.5             | 269.1<br>± 11.7          | 1598.0<br>± 3.6             | 123.1<br>± 15.1          | 0.77<br>± 0.07 |
|                  | 660            | 501.5 ±<br>135.3 <sup>a</sup>              | 1363.1<br>± 1.3             | 281.8<br>± 12.5          | 1586.9<br>± 4.6             | 156.0<br>± 3.4           | 0.98<br>± 0.06 |
|                  | 785            | - <sup>b</sup>                             | - <sup>b</sup>              | - <sup>b</sup>           | - <sup>b</sup>              | - <sup>b</sup>           | - <sup>b</sup> |
| Biochar-A        | 325            | 9.2<br>± 0.3                               | 1377.5<br>± 5.9             | 228.3<br>± 9.8           | 1602.6<br>± 1.3             | 87.4<br>± 3.4            | 0.45<br>± 0.01 |
|                  | 532            | 33.0 ±<br>29.3                             | 1338.8<br>± 7.6             | 274.6<br>± 2.7           | 1599.2<br>± 3.5             | 84.8<br>± 4.7            | 0.73<br>± 0.02 |
|                  | 660            | 5.4<br>± 2.2                               | 1337.2<br>± 2.2             | 264.2<br>± 7.2           | 1596.7<br>± 2.5             | 115.5<br>± 7.8           | 1.00<br>± 0.02 |
|                  | 785            | 10.8<br>± 5.3                              | 1319.9<br>± 5.7             | 261.5<br>± 32.2          | 1590.1<br>± 4.6             | 130.3<br>± 2.2           | 1.13<br>± 0.00 |
| Biochar-B        | 325            | 13.8<br>± 0.3                              | 1387.7<br>± 2.6             | 213.2<br>± 4.7           | 1603.8<br>± 2.2             | 81.6<br>± 2.2            | 0.45<br>± 0.01 |
|                  | 532            | 17.1 ±<br>11.3                             | 1339.8<br>± 6.8             | 236.1<br>± 16.7          | 1603.7<br>± 2.3             | 76.1<br>± 1.3            | 0.73<br>± 0.04 |

|  |     |               |                 |                 |                 |               |                |
|--|-----|---------------|-----------------|-----------------|-----------------|---------------|----------------|
|  | 660 | 12.5<br>± 1.8 | 1330.9<br>± 3.4 | 220.3<br>± 9.0  | 1597.2<br>± 3.8 | 86.0<br>± 4.4 | 0.96<br>± 0.01 |
|  | 785 | 22.4<br>± 3.6 | 1316.7<br>± 0.0 | 218.3<br>± 13.5 | 1592.8<br>± 2.2 | 98.6<br>± 3.4 | 1.13<br>± 0.02 |

<sup>a</sup> Spectra recorded after 100 s of photobleaching at  $P \leq 0.4$  mW.

<sup>b</sup> Spectra not recorded.

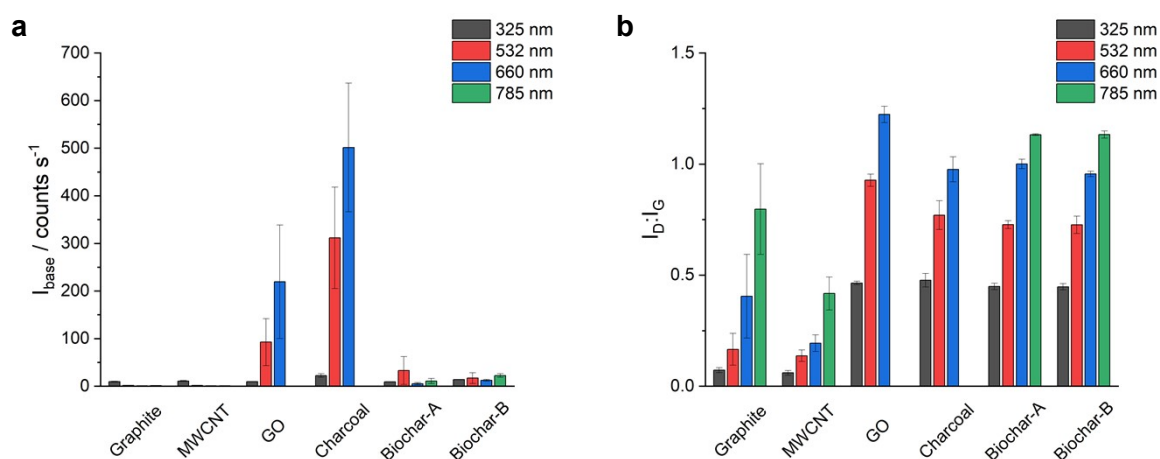

**Figure S13.** (a)  $I_{\text{base}}$  and (b)  $I_{\text{D}}:I_{\text{G}}$  from  $\lambda = 325$  (black), 532 (red), 660 (blue) and 785 nm (green) Raman spectra of the reference carbons investigated in this study. Error bars reflect one standard deviation from  $N=5$  measurements for  $\lambda = 532$  nm and  $N = 3$  measurements for  $\lambda = 325$ , 660 and 785 nm. Prior to spectrum acquisition, GO ( $\lambda = 532$  and 660 nm) and Charcoal ( $\lambda = 660$  nm) were photobleached for 100 s at  $P \leq 0.4$  mW.

### Conclusions:

These measurements indicate: (i) the extent of baseline fluorescence, quantified using  $I_{\text{base}}$ , depends on both the nature of the specific carbon (more ordered carbons, such as graphite and MWCNT, are seemingly less impacted) and the wavelength of the excitation laser (in general, increasing the wavelength increases  $I_{\text{base}}$ ); and (ii) the dispersive nature of the D band and associated sensitivity of both the D band position and  $I_{\text{D}}:I_{\text{G}}$  to excitation laser wavelength.

### S3. The effect of photobleaching at high laser power on the Raman spectra of the reference carbons

Experiment:

A Raman spectrum ( $\lambda = 532 \text{ nm}$ ) was acquired:

- at  $P = 0.4 \text{ mW}$  (before),
- at  $P = 0.4 \text{ mW}$ , after a 30 s exposure at  $P = 4.0 \text{ mW}$  (after exp 1),
- at  $P = 0.4 \text{ mW}$ , after a further 30 s exposure at  $P = 10.0 \text{ mW}$  (after exp 1+2),
- at  $P = 0.4 \text{ mW}$ , after a further 30 s exposure at  $P = 20.0 \text{ mW}$  (after exp 1+2+3).

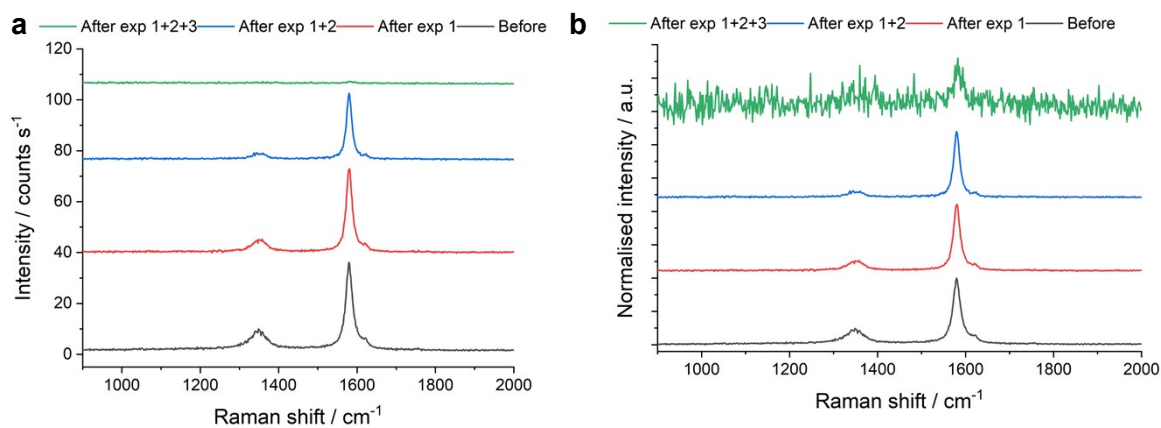

**Figure S14.** The effect of photobleaching graphite at high laser power. The spectra presented in (a) have not been processed and those presented in (b) have been processed as described in the Experimental section. Here,  $I_{\text{base}} = 1.7, 1.6, 1.5$  and  $0.8 \text{ counts s}^{-1}$  as the experiments progress.

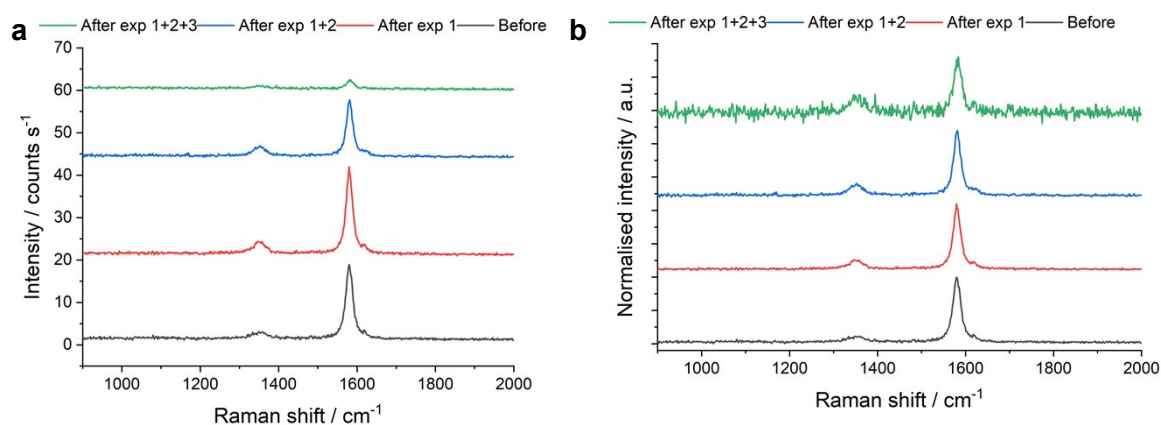

**Figure S15.** The effect of photobleaching MWCNT at high laser power. The spectra presented in (a) have not been processed and those presented in (b) have been processed as described in the Experimental section. Here,  $I_{\text{base}} = 1.2, 1.3, 1.1$  and  $0.7 \text{ counts s}^{-1}$  as the experiments progress.

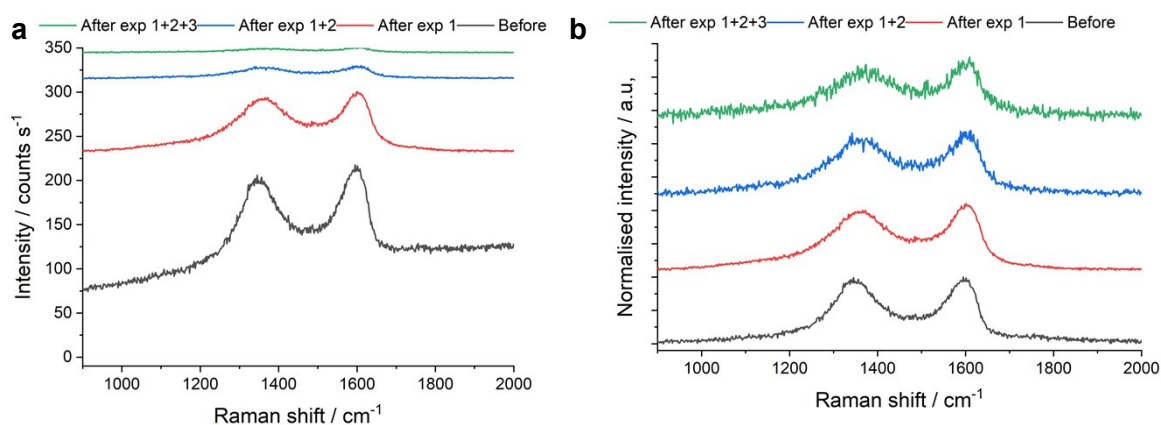

**Figure S16.** The effect of photobleaching GO at high laser power. The sample was photobleached for 100 s at  $p = 0.4$  mW prior to spectrum acquisition to suppress some of the observed fluorescence. The spectra presented in (a) have not been processed and those presented in (b) have been processed as described in the Experimental section. Here,  $I_{\text{base}} = 124.8, 10.0, 4.7$  and  $2.6$  counts  $\text{s}^{-1}$  as the experiments progress.

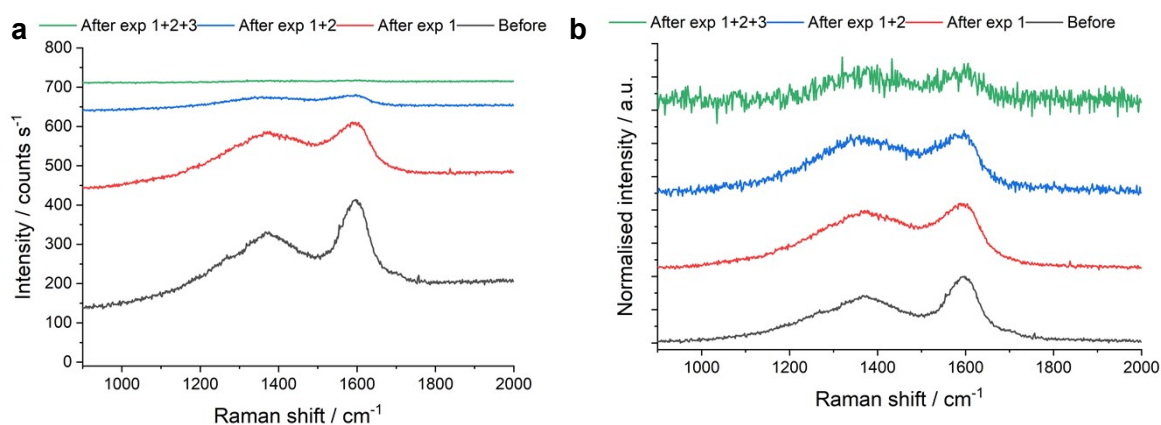

**Figure S17.** The effect of photobleaching charcoal at high laser power. The spectra presented in (a) have not been processed and those presented in (b) have been processed as described in the Experimental section. Here,  $I_{\text{base}} = 207.7, 124.4, 42.8$  and  $13.8$  counts  $\text{s}^{-1}$  as the experiments progress.

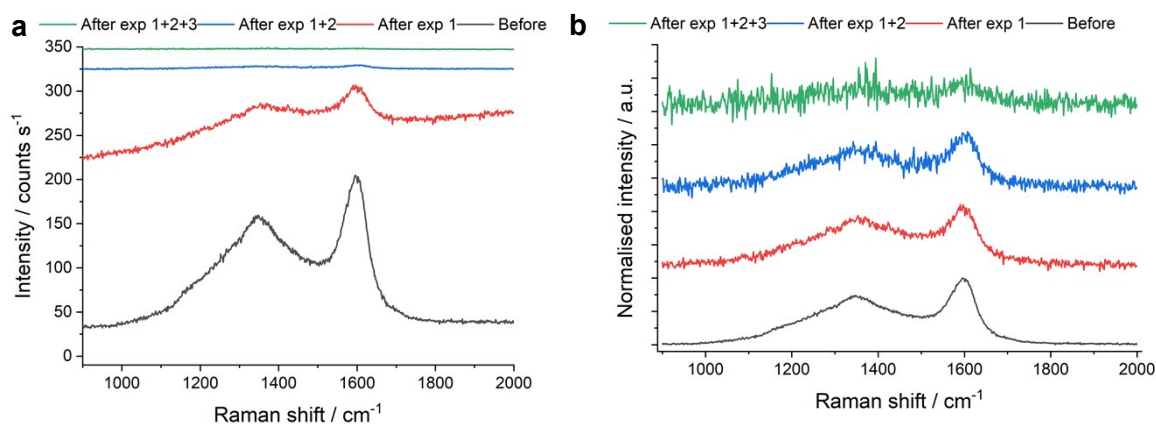

**Figure S18.** The effect of photobleaching Biochar-A at high laser power. The spectra presented in (a) have not been processed and those presented in (b) have been processed as described in the Experimental section. Here,  $I_{\text{base}} = 38.4, 131.6, 3.3$  and  $1.7$  counts  $\text{s}^{-1}$  as the experiments progress.

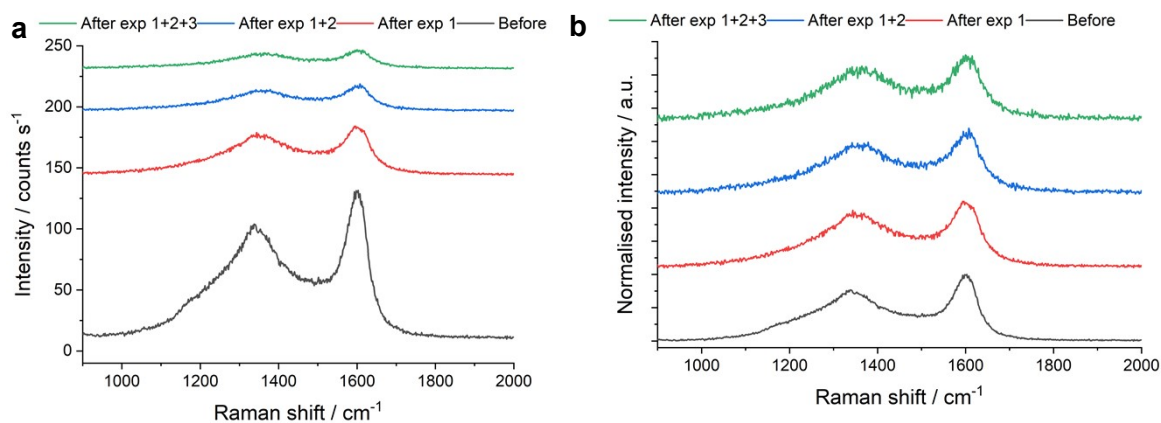

**Figure S19.** The effect of photobleaching Biochar-B at high laser power. The spectra presented in (a) have not been processed and those presented in (b) have been processed as described in the Experimental section. Here,  $I_{\text{base}} = 12.1, 6.1, 3.8$  and  $3.2$  counts  $\text{s}^{-1}$  as the experiments progress.

### Conclusions:

These experiments indicate that photobleaching carbons at high laser power ( $P > 0.4$  mW) is an ineffective route for fluorescence suppression, as, despite higher powers typically reducing  $I_{\text{base}}$ , this process results in a variety of irreversible material- and power-dependent changes in the structural organisation of the underlying carbon, and under extreme conditions, photothermally-induced local combustion and sample loss.

#### S4. The effect of photobleaching at low laser power on the Raman spectra of the reference carbons

##### Experiment:

A Raman spectrum (acquisition time = 2 s) was obtained every 2.5 s over a 300 s duration and  $I_{\text{base}}$  (the intensity at  $1900\text{ cm}^{-1}$ ) extracted at each time point. The experiments were performed separately at  $\lambda = 325$  (black), 532 (red), 660 (blue) and 785 nm (green).

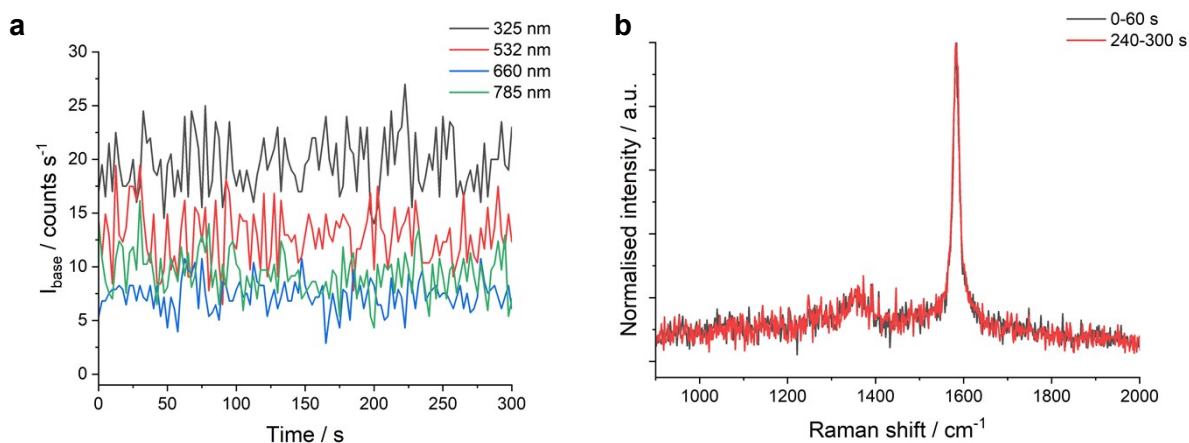

**Figure S20.** The effect of photobleaching graphite at low power over time. (a) Graphical correlation of  $I_{\text{base}}$  with time for each of the excitation laser wavelengths explored. (b) The mean Raman spectra ( $\lambda = 532\text{ nm}$ ) obtained by averaging the spectra collected within the first 60 s (black) and last 60 s (red) of the experiment. The spectra presented in (b) have been processed as described in the Experimental section.

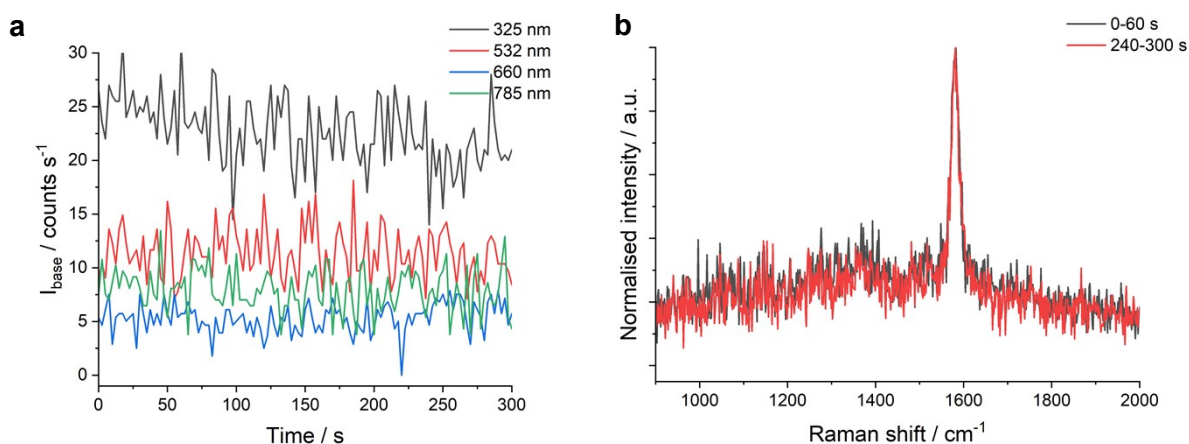

**Figure S21.** The effect of photobleaching MWCNT at low power over time. (a) Graphical correlation of  $I_{\text{base}}$  with time for each of the excitation laser wavelengths explored. (b) The mean Raman spectra ( $\lambda = 532\text{ nm}$ ) obtained by averaging the spectra collected within the first 60 s (black) and last 60 s (red) of the experiment.

( $\lambda = 532$  nm) obtained by averaging the spectra collected within the first 60 s (black) and last 60 s (red) of the experiment. The spectra presented in (b) have been processed as described in the Experimental section.

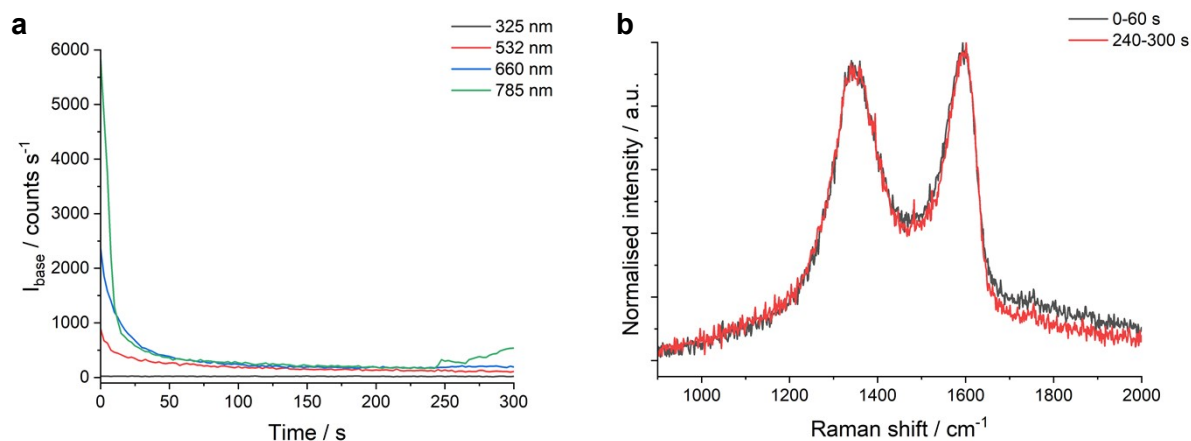

**Figure S22.** The effect of photobleaching GO at low power over time. (a) Graphical correlation of  $I_{\text{base}}$  with time for each of the excitation laser wavelengths explored. (b) The mean Raman spectra ( $\lambda = 532$  nm) obtained by averaging the spectra collected within the first 60 s (black) and last 60 s (red) of the experiment. The spectra presented in (b) have been processed as described in the Experimental section.

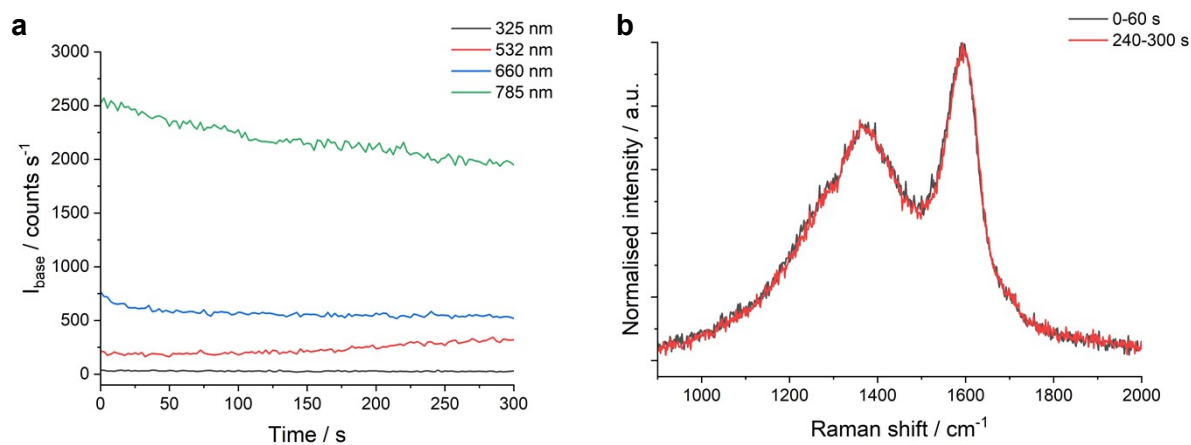

**Figure S23.** The effect of photobleaching charcoal at low power over time. (a) Graphical correlation of  $I_{\text{base}}$  with time for each of the excitation laser wavelengths explored. (b) The mean Raman spectra ( $\lambda = 532$  nm) obtained by averaging the spectra collected within the first 60 s (black) and last 60 s (red) of the experiment. The spectra presented in (b) have been processed as described in the Experimental section.

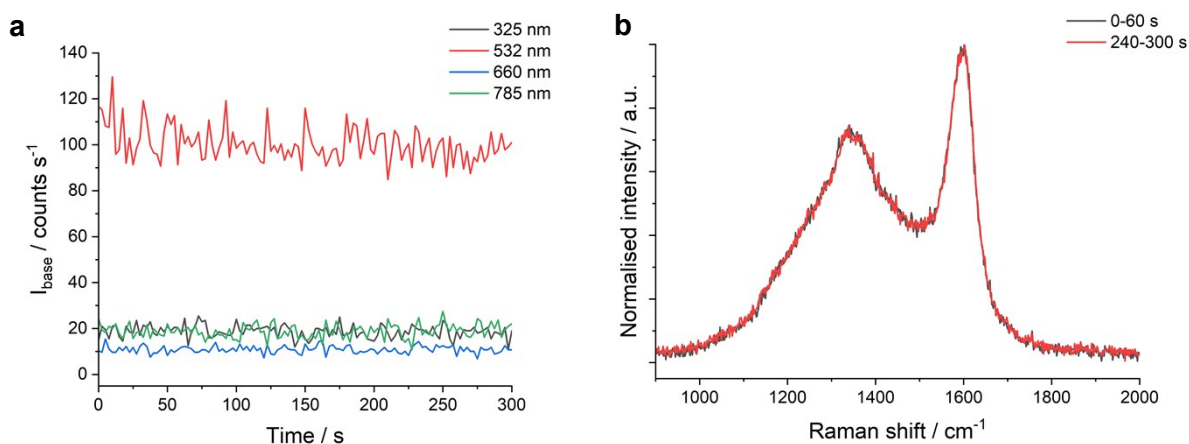

**Figure S24.** The effect of photobleaching Biochar-A at low power over time. (a) Graphical correlation of  $I_{\text{base}}$  with time for each of the excitation laser wavelengths explored. (b) The mean Raman spectra ( $\lambda = 532 \text{ nm}$ ) obtained by averaging the spectra collected within the first 60 s (black) and last 60 s (red) of the experiment. The spectra presented in (b) have been processed as described in the Experimental section.

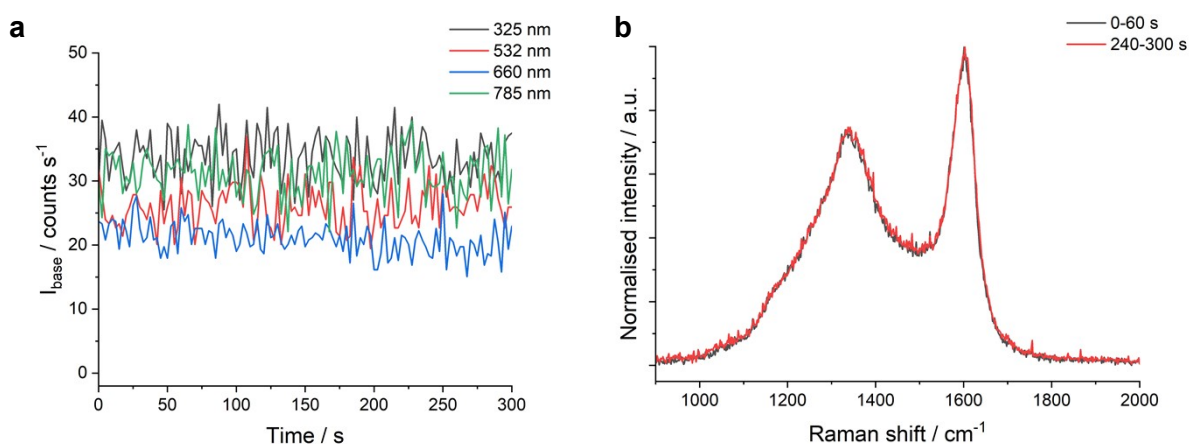

**Figure S25.** The effect of photobleaching Biochar-B at low power over time. (a) Graphical correlation of  $I_{\text{base}}$  with time for each of the excitation laser wavelengths explored. (b) The mean Raman spectra ( $\lambda = 532 \text{ nm}$ ) obtained by averaging the spectra collected within the first 60 s (black) and last 60 s (red) of the experiment. The spectra presented in (b) have been processed as described in the Experimental section.

### Conclusion:

These experiments indicate that photobleaching at low laser power ( $P \leq 0.4 \text{ mW}$ ): (i) results in no significant changes in the structure of the carbons (in all cases, the spectra obtained at 0-60 s and 240-300 s are effectively identical); and (ii) represents a tool for fluorescence suppression, particularly for samples (e.g., GO) where baseline fluorescence is significant. However, it is important to note that low power photobleaching is not a universal route for

reduction of fluorescence, as extended periods of photobleaching in some cases (e.g. 785 nm irradiation of GO and 532 nm irradiation of charcoal) resulted in increases in  $I_{\text{base}}$ .

## 55. Fitting the Raman spectra of the reference carbons

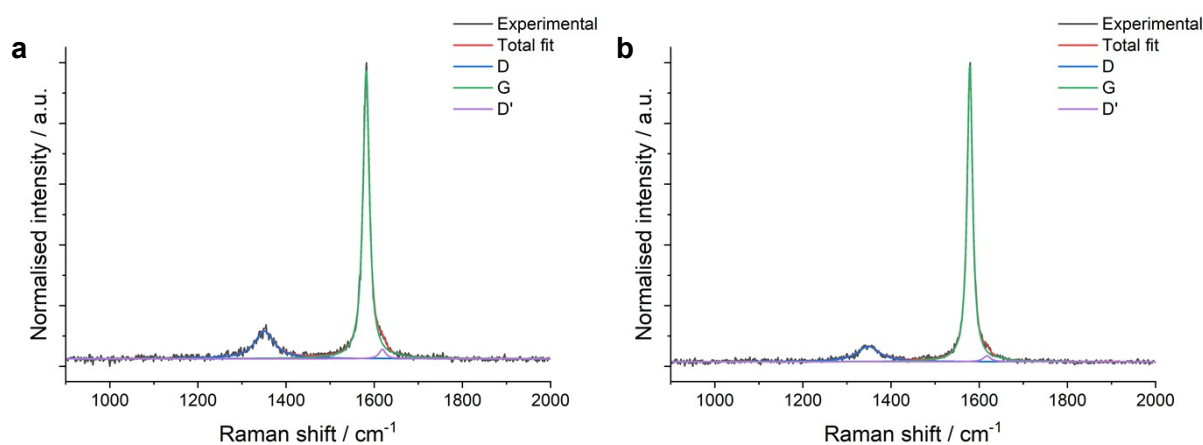

**Figure S26.** A representative Raman spectrum ( $\lambda = 532$  nm) of graphite before (a) and after (b) thermal treatment using HyPy. The spectra have been processed as described in the Experimental section. The D and G bands could be well described using three Lorentzian lineshapes, namely the D, G and D' bands (reduced  $X^2 = 0.54$  and  $0.29$  for a and b, respectively).

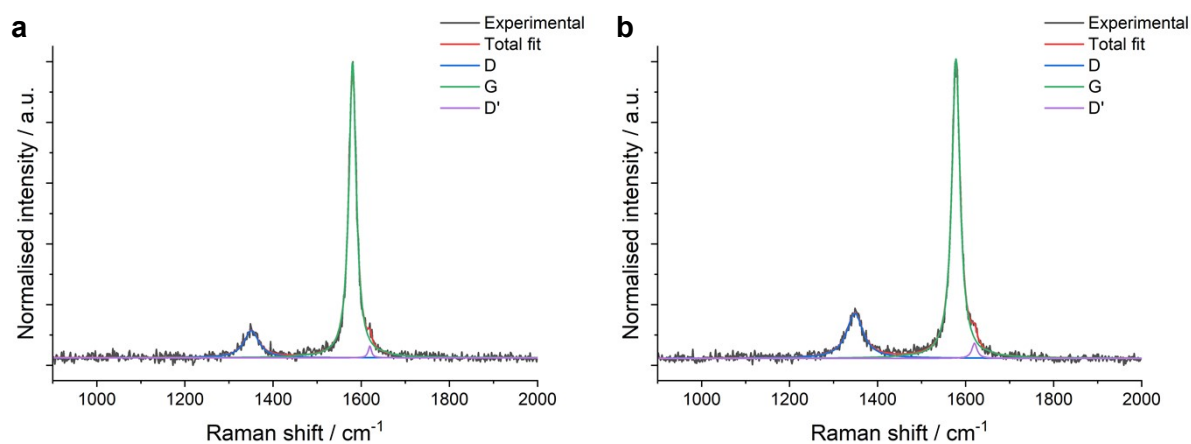

**Figure S27.** A representative Raman spectrum ( $\lambda = 532$  nm) of MWCNT before (a) and after (b) thermal treatment using HyPy. The spectra have been processed as described in the Experimental section. The D and G bands could be well described using three Lorentzian lineshapes, namely the D, G and D' bands (reduced  $X^2 = 1.13$  and  $1.06$  for a and b, respectively).

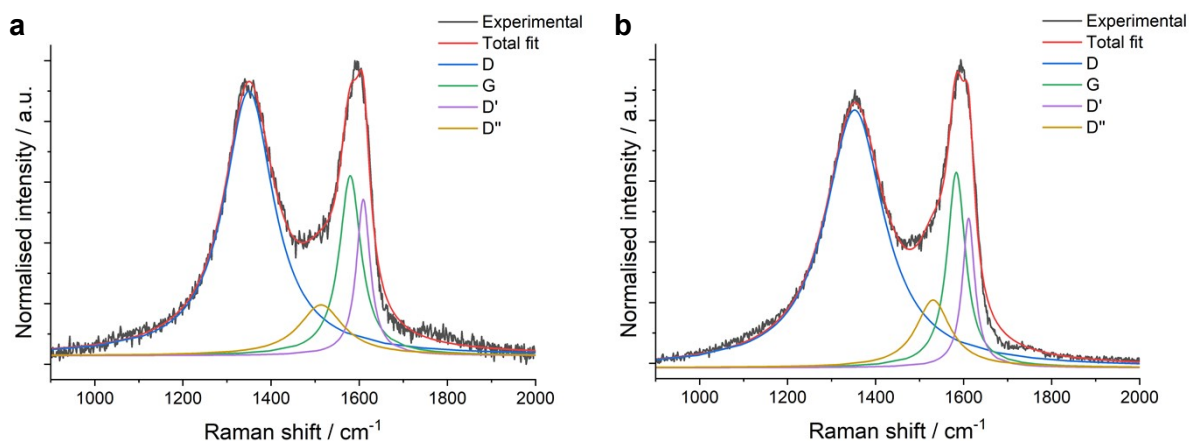

**Figure S28.** A representative Raman spectrum ( $\lambda = 532$  nm) of GO before (a) and after (b) thermal treatment using HyPy. The spectra have been processed as described in the Experimental section. The D and G bands could be reasonably well described using four Lorentzian lineshapes, namely the D, G, D' and D'' bands (reduced  $X^2 = 5.20$  and  $4.89$  for a and b, respectively). Prior to spectrum acquisition, GO not subject to thermal treatment (i.e., before) was photobleached for 100 s at  $p = 0.4$  mW.

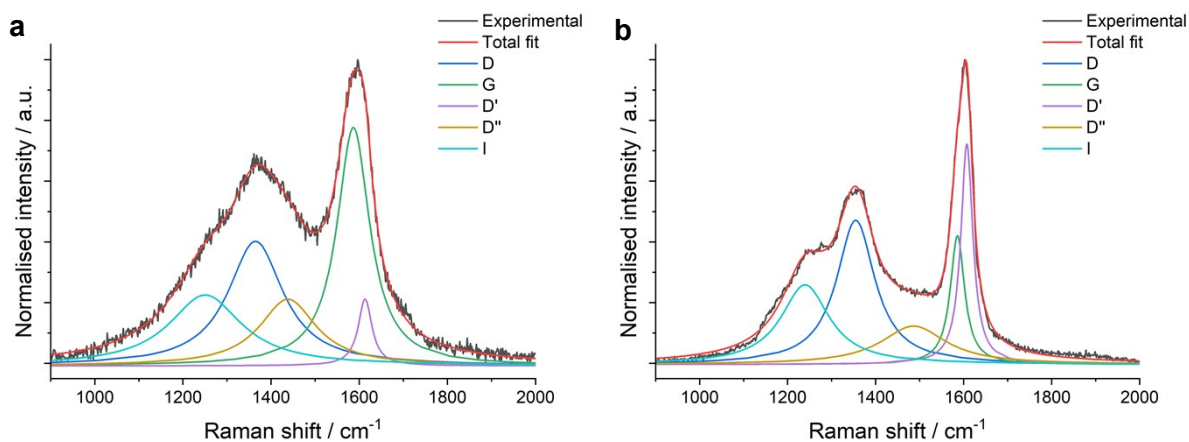

**Figure S29.** A representative Raman spectrum ( $\lambda = 532$  nm) of charcoal before (a) and after (b) thermal treatment using HyPy. The spectra have been processed as described in the Experimental section. The D and G bands could be well described using five Lorentzian lineshapes, namely the D, G, D', D'' and I bands (reduced  $X^2 = 2.39$  and  $1.66$  for a and b, respectively).

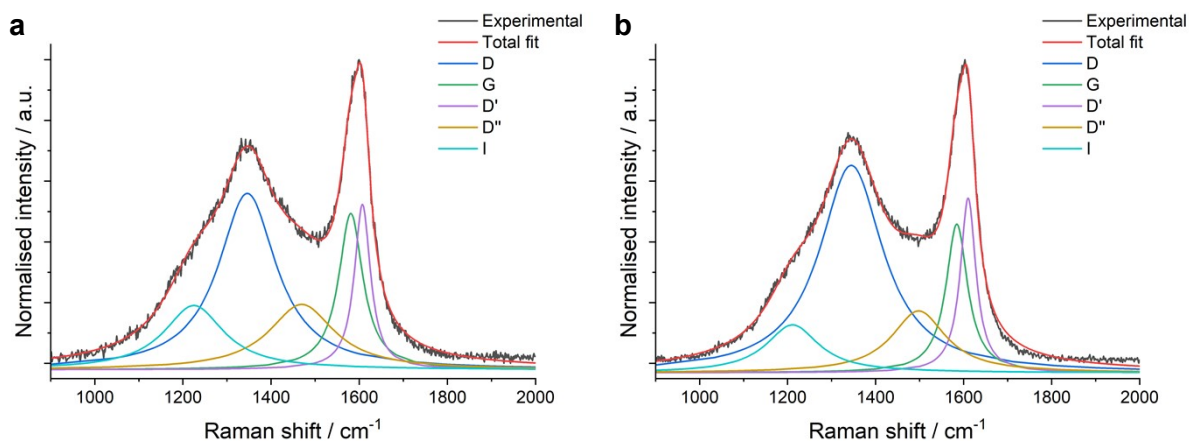

**Figure S30.** A representative Raman spectrum ( $\lambda = 532$  nm) of Biochar-A before (a) and after (b) thermal treatment using HyPy. The spectra have been processed as described in the Experimental section. The D and G bands could be well described using five Lorentzian lineshapes, namely the D, G, D', D'' and I bands (reduced  $X^2 = 2.09$  and  $1.94$  for a and b, respectively).

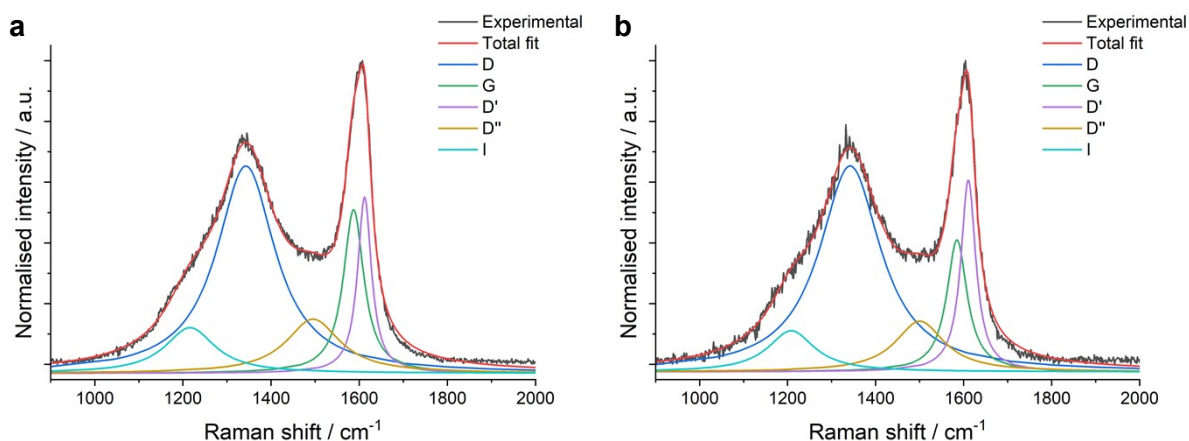

**Figure S31.** A representative Raman spectrum ( $\lambda = 532$  nm) of Biochar-B before (a) and after (b) thermal treatment using HyPy. The spectra have been processed as described in the Experimental section. The D and G bands could be well described using five Lorentzian lineshapes, namely the D, G, D', D'' and I bands (reduced  $X^2 = 1.88$  and  $3.13$  for a and b, respectively).

**Table S2.** Spectral characteristics extracted using the peak fitting method from the point spectra ( $\lambda = 532$  nm) of the reference carbons investigated in this study by  $\mu$ RS before treatment and after HyPy. Values are quoted as mean plus/minus one standard deviation from N=5 measurements.

| Reference carbon | Treatment         | I band <sup>a</sup>         |                          | D band <sup>a</sup>         |                          | D'' band <sup>a</sup>       |                          | G band <sup>a</sup>         |                          | D' band <sup>a</sup>        |                          | I <sub>D</sub> :I <sub>G</sub> | A <sub>D</sub> :A <sub>G</sub> |
|------------------|-------------------|-----------------------------|--------------------------|-----------------------------|--------------------------|-----------------------------|--------------------------|-----------------------------|--------------------------|-----------------------------|--------------------------|--------------------------------|--------------------------------|
|                  |                   | Position / cm <sup>-1</sup> | Width / cm <sup>-1</sup> | Position / cm <sup>-1</sup> | Width / cm <sup>-1</sup> | Position / cm <sup>-1</sup> | Width / cm <sup>-1</sup> | Position / cm <sup>-1</sup> | Width / cm <sup>-1</sup> | Position / cm <sup>-1</sup> | Width / cm <sup>-1</sup> |                                |                                |
| Graphite         | None              | n/a                         | n/a                      | 1350.4<br>± 0.7             | 54.6<br>± 2.3            | n/a                         | n/a                      | 1581.6<br>± 0.3             | 19.5<br>± 3.1            | 1620.9<br>± 1.6             | 18.2<br>± 4.0            | 0.14<br>± 0.08                 | 0.37<br>± 0.15                 |
|                  | HyPy              | n/a                         | n/a                      | 1348.9<br>± 0.8             | 59.4<br>± 5.7            | n/a                         | n/a                      | 1580.0<br>± 1.4             | 18.6<br>± 4.1            | 1605.4<br>± 13.5            | 45.4<br>± 28.7           | 0.13<br>± 0.09                 | 0.39<br>± 0.19                 |
| MWCNT            | None              | n/a                         | n/a                      | 1350.9<br>± 0.3             | 43.1<br>± 3.1            | n/a                         | n/a                      | 1579.9<br>± 0.8             | 21.1<br>± 0.7            | 1620.3<br>± 1.9             | 7.4<br>± 4.9             | 0.11<br>± 0.02                 | 0.21<br>± 0.04                 |
|                  | HyPy              | n/a                         | n/a                      | 1352.2<br>± 2.3             | 42.6<br>± 1.3            | n/a                         | n/a                      | 1580.2<br>± 1.4             | 20.9<br>± 1.3            | 1622.1<br>± 0.2             | 8.8<br>± 2.0             | 0.10<br>± 0.03                 | 0.21<br>± 0.06                 |
| GO               | None <sup>b</sup> | n/a                         | n/a                      | 1350.0<br>± 2.8             | 150.0<br>± 15.4          | 1518.1<br>± 7.4             | 119.2<br>± 11.0          | 1578.5<br>± 3.2             | 59.3<br>± 2.8            | 1608.6<br>± 2.3             | 39.3<br>± 3.4            | 1.51<br>± 0.09                 | 3.86<br>± 0.63                 |
|                  | HyPy              | n/a                         | n/a                      | 1351.5<br>± 1.5             | 163.2<br>± 3.5           | 1529.2<br>± 1.5             | 95.7<br>± 1.1            | 1579.4<br>± 4.3             | 56.9<br>± 13.9           | 1608.6<br>± 2.4             | 35.5<br>± 2.1            | 1.37<br>± 0.06                 | 4.03<br>± 0.57                 |
| Charcoal         | None              | 1248.6<br>± 4.2             | 197.0<br>± 6.6           | 1365.2<br>± 3.3             | 159.7<br>± 22.3          | 1446.0<br>± 14.8            | 178.1<br>± 20.9          | 1583.6<br>± 3.9             | 95.4<br>± 4.2            | 1610.3<br>± 2.5             | 46.1<br>± 7.6            | 0.68<br>± 0.16                 | 1.16<br>± 0.42                 |
|                  | HyPy              | 1242.4<br>± 1.6             | 136.1<br>± 2.5           | 1356.7<br>± 1.1             | 104.9<br>± 3.0           | 1475.0<br>± 8.7             | 195.8<br>± 9.2           | 1584.1<br>± 1.5             | 39.4<br>± 2.2            | 1606.6<br>± 0.7             | 35.7<br>± 1.5            | 1.13<br>± 0.06                 | 3.04<br>± 0.36                 |
| Biochar-A        | None              | 1219.8<br>± 6.6             | 156.6<br>± 10.8          | 1344.8<br>± 2.5             | 164.8<br>± 8.2           | 1478.5<br>± 7.4             | 162.2<br>± 13.0          | 1579.6<br>± 2.4             | 63.1<br>± 2.6            | 1606.6<br>± 1.1             | 45.2<br>± 2.4            | 1.30<br>± 0.24                 | 3.50<br>± 0.87                 |
|                  | HyPy              | 1215.0<br>± 7.8             | 148.5<br>± 11.4          | 1345.7<br>± 2.8             | 173.7<br>± 6.4           | 1491.4<br>± 7.6             | 153.4<br>± 9.1           | 1584.1<br>± 0.9             | 60.9<br>± 1.6            | 1610.3<br>± 0.6             | 42.4<br>± 1.7            | 1.26<br>± 0.12                 | 3.64<br>± 0.55                 |
| Biochar-B        | None              | 1220.7<br>± 6.9             | 144.1<br>± 5.3           | 1344.7<br>± 3.4             | 155.8<br>± 5.5           | 1484.5<br>± 10.0            | 155.7<br>± 9.0           | 1585.8<br>± 1.3             | 57.2<br>± 1.0            | 1611.0<br>± 1.2             | 39.6<br>± 1.2            | 1.21<br>± 0.05                 | 3.27<br>± 0.53                 |
|                  | HyPy              | 1209.2<br>± 4.7             | 130.2<br>± 8.8           | 1341.6<br>± 1.5             | 166.8<br>± 5.7           | 1498.3<br>± 3.4             | 141.8<br>± 7.1           | 1585.2<br>± 0.7             | 56.1<br>± 0.9            | 1610.2<br>± 0.4             | 40.6<br>± 0.8            | 1.36<br>± 0.07                 | 4.32<br>± 0.46                 |

<sup>a</sup> Sadesky *et al.* (Carbon 43 (2005) 1731-1742) summarised the names, positions and assignments of the first-order Raman bands as follows: I band ( $\sim 1200$   $\text{cm}^{-1}$ , disordered graphitic lattice mode of  $A_{1g}$  symmetry), D band ( $\sim 1350$   $\text{cm}^{-1}$ , disordered graphitic lattice mode of  $A_{1g}$  symmetry), D'' band ( $\sim 1500$   $\text{cm}^{-1}$ , amorphous carbon), G band (graphitic lattice mode of  $E_{2g}$  symmetry), and D' band ( $\sim 1620$   $\text{cm}^{-1}$ , disordered graphitic lattice mode of  $E_{2g}$  symmetry).

<sup>b</sup> Prior to spectrum acquisition, GO not subject to thermal treatment (i.e., before) was photobleached for 100 s at  $P = 0.4$  mW.

**S6. The effect of HyPy at different temperatures on the structure of Biochar-A**

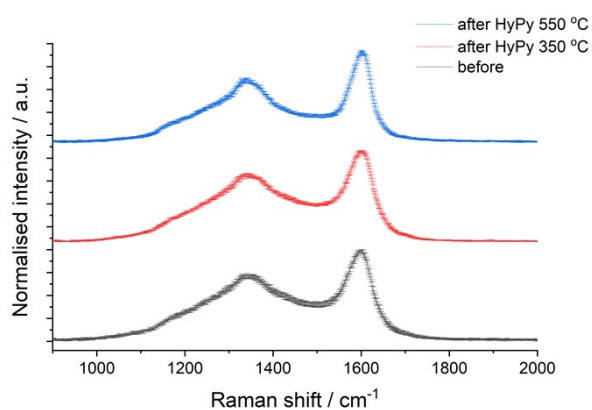

**Figure S32.** Mean Raman spectra ( $\lambda = 532$  nm) of Biochar-A before treatment (black), after HyPy at 350 °C (red), and after HyPy at 550 °C (blue). Error bars reflect one standard deviation from N=5 measurements. The spectra have been processed as described in the Experimental section.

**Table S3.** Spectral characteristics extracted using the peak limits method from the point spectra ( $\lambda = 532$  nm) of Biochar-A before treatment, after HyPy at 350 °C and after HyPy at 550 °C. Values are quoted as mean plus/minus one standard deviation from N=5 measurements.

| Treatment        | $I_{\text{base}} / \text{counts s}^{-1}$ | D band                      |                          | G band                      |                          | $I_{\text{D}}:I_{\text{G}}$ |
|------------------|------------------------------------------|-----------------------------|--------------------------|-----------------------------|--------------------------|-----------------------------|
|                  |                                          | Position / $\text{cm}^{-1}$ | Width / $\text{cm}^{-1}$ | Position / $\text{cm}^{-1}$ | Width / $\text{cm}^{-1}$ |                             |
| None             | 33.0<br>$\pm 29.3$                       | 1338.8<br>$\pm 7.6$         | 274.6<br>$\pm 2.7$       | 1599.2<br>$\pm 3.5$         | 84.8<br>$\pm 4.7$        | 0.73<br>$\pm 0.02$          |
| HyPy<br>(350 °C) | 10.7<br>$\pm 2.2$                        | 1341.0<br>$\pm 4.0$         | 274.0<br>$\pm 2.4$       | 1598.3<br>$\pm 3.4$         | 86.4<br>$\pm 2.8$        | 0.74<br>$\pm 0.01$          |
| HyPy<br>(550 °C) | 32.8<br>$\pm 22.4$                       | 1339.1<br>$\pm 2.4$         | 192.8<br>$\pm 13.5$      | 1601.1<br>$\pm 1.1$         | 63.1<br>$\pm 1.3$        | 0.70<br>$\pm 0.02$          |

## S7. The effect of NPy on the structure of the reference carbons

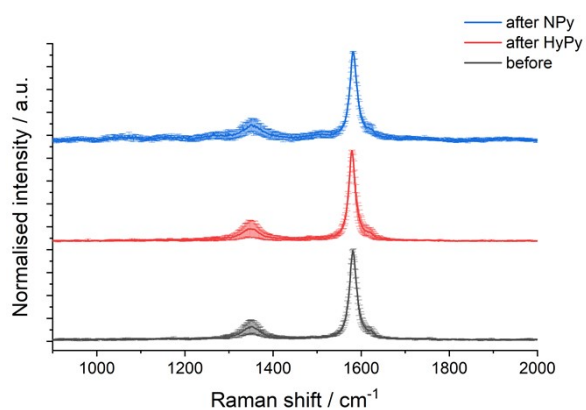

**Figure S33.** Mean Raman spectra ( $\lambda = 532$  nm) of graphite before treatment (black), after HyPy (red) and after NPy (blue). Error bars reflect one standard deviation from N=5 measurements. The spectra have been processed as described in the Experimental section.

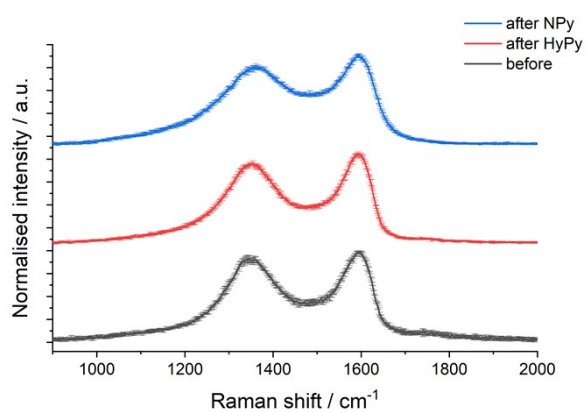

**Figure S34.** Mean Raman spectra ( $\lambda = 532$  nm) of GO before treatment (black), after HyPy (red) and after NPy (blue). Error bars reflect one standard deviation from N=5 measurements. The spectra have been processed as described in the Experimental section. Prior to spectrum acquisition, GO not subject to thermal treatment (i.e., before) was photobleached for 100 s at P = 0.4 mW.

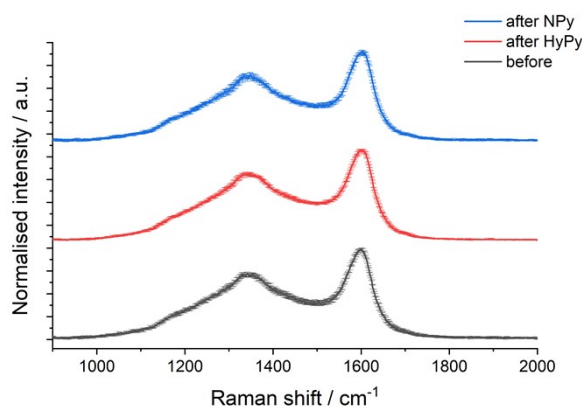

**Figure S35.** Mean Raman spectra ( $\lambda = 532$  nm) of Biochar-A before treatment (black), after HyPy (red) and after NPy (blue). Error bars reflect one standard deviation from N=5 measurements. The spectra have been processed as described in the Experimental section.

**Table S4.** Spectral characteristics extracted using the peak limits method from the point spectra ( $\lambda = 532$  nm) of Graphite, GO and Biochar-A before treatment, after HyPy and after NPy. Values are quoted as mean plus/minus one standard deviation from N=5 measurements.

| Reference carbon | Treatment         | $I_{\text{base}} / \text{counts s}^{-1}$ | D band                      |                          | G band                      |                          | $I_{\text{D}}:I_{\text{G}}$ |
|------------------|-------------------|------------------------------------------|-----------------------------|--------------------------|-----------------------------|--------------------------|-----------------------------|
|                  |                   |                                          | Position / $\text{cm}^{-1}$ | Width / $\text{cm}^{-1}$ | Position / $\text{cm}^{-1}$ | Width / $\text{cm}^{-1}$ |                             |
| Graphite         | None              | 1.8<br>$\pm 0.1$                         | 1351.9<br>$\pm 2.6$         | 52.0<br>$\pm 3.7$        | 1581.3<br>$\pm 1.3$         | 21.4<br>$\pm 2.5$        | 0.17<br>$\pm 0.07$          |
|                  | HyPy              | 1.3<br>$\pm 0.1$                         | 1350.3<br>$\pm 6.7$         | 54.5<br>$\pm 3.5$        | 1579.7<br>$\pm 0.7$         | 19.8<br>$\pm 4.2$        | 0.15<br>$\pm 0.09$          |
|                  | NPy               | 11.9<br>$\pm 2.6$                        | 1352.8<br>$\pm 2.9$         | 59.9<br>$\pm 14.1$       | 1581.3<br>$\pm 0.7$         | 22.6<br>$\pm 1.8$        | 0.21<br>$\pm 0.07$          |
| GO               | None <sup>a</sup> | 92.6<br>$\pm 49.3$                       | 1348.0<br>$\pm 10.0$        | 163.0<br>$\pm 14.2$      | 1593.1<br>$\pm 3.2$         | 103.5<br>$\pm 6.5$       | 0.93<br>$\pm 0.03$          |
|                  | HyPy              | 6.9<br>$\pm 1.7$                         | 1354.1<br>$\pm 5.1$         | 158.6<br>$\pm 5.0$       | 1593.4<br>$\pm 4.2$         | 93.6<br>$\pm 2.1$        | 0.90<br>$\pm 0.01$          |
|                  | NPy               | 13.8<br>$\pm 1.9$                        | 1360.8<br>$\pm 5.3$         | 239.8<br>$\pm 3.8$       | 1594.6<br>$\pm 1.7$         | 140.0<br>$\pm 0.7$       | 0.89<br>$\pm 0.02$          |
| Biochar-A        | None              | 33.0<br>$\pm 29.3$                       | 1338.8<br>$\pm 7.6$         | 274.6<br>$\pm 2.7$       | 1599.2<br>$\pm 3.5$         | 84.8<br>$\pm 4.7$        | 0.73<br>$\pm 0.02$          |
|                  | HyPy              | 10.7<br>$\pm 2.2$                        | 1341.0<br>$\pm 4.0$         | 274.0<br>$\pm 2.4$       | 1598.3<br>$\pm 3.4$         | 86.4<br>$\pm 2.8$        | 0.74<br>$\pm 0.01$          |
|                  | NPy               | 16.1<br>$\pm 2.3$                        | 1350.9<br>$\pm 4.3$         | 270.4<br>$\pm 1.6$       | 1601.7<br>$\pm 1.8$         | 82.6<br>$\pm 0.9$        | 0.74<br>$\pm 0.02$          |

<sup>a</sup> Prior to spectrum acquisition, GO not subject to thermal treatment (i.e., before) was photobleached for 100 s at P = 0.4 mW.

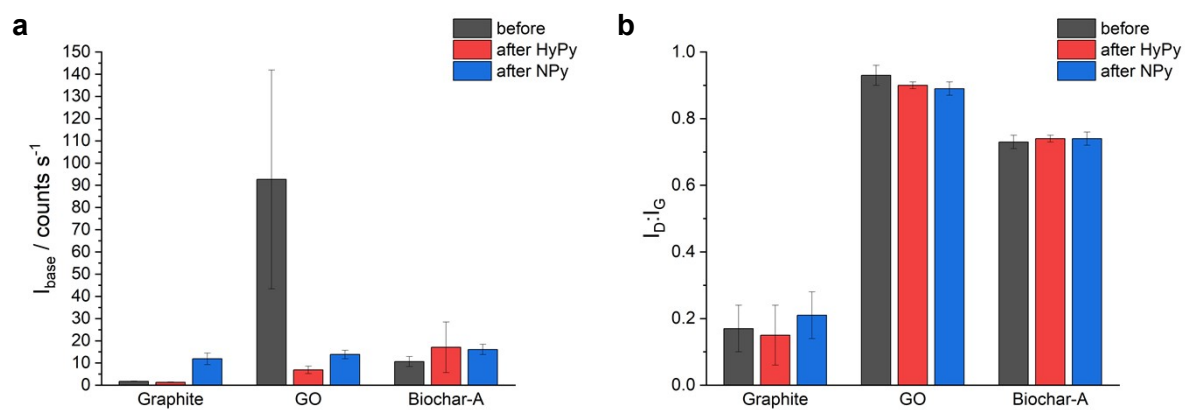

**Figure S36.** (a)  $I_{\text{base}}$  and (b)  $I_{\text{D}}:I_{\text{G}}$  before treatment (black), after HyPy (red) and after NPy (blue) for three of the reference carbons investigated in this study. Error bars reflect one standard deviation from N=5 measurements. Prior to spectrum acquisition, GO not subject to thermal treatment (i.e., before) was photobleached for 100 s at P = 0.4 mW.

## S8. The dominance of fluorescence in the Raman spectra of the IDIDs

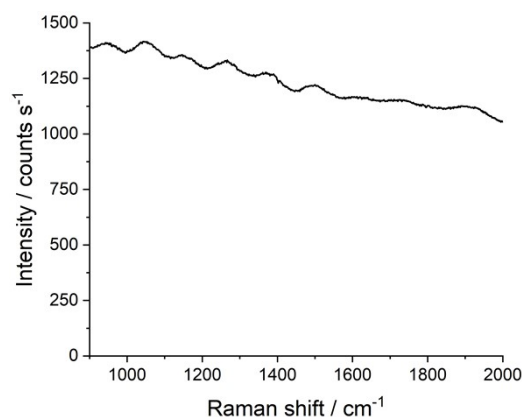

**Figure 37.** A representative Raman spectrum ( $\lambda = 532$  nm) of IDID-A prior to treatment using HyPy. Our detector saturates above  $\sim 60000$  counts (i.e.,  $\sim 1000$  counts  $s^{-1}$  for a 60 s acquisition) with the artefact ripples noted in the spectrum above consistent with detector saturation. As such, for IDIDs where  $I_{\text{base}} > 1000$  counts  $s^{-1}$ , it is not possible to obtain meaningful Raman spectra as the baseline is above the detector saturation limit. It is important to note that where  $I_{\text{base}} = \sim 500$ - $1000$  counts  $s^{-1}$  it is still not possible to collect Raman spectra as some of the peak signature of the carbons (i.e., the D and G bands) will be above the saturation limit, even if the baseline adjacent to the peaks is not. Reducing the spectrum acquisition time will decrease the intensity of the baseline, but, particularly for IDIDs, long acquisition times were essential to confer sufficient signal-to-noise ratio that peak parameters could be extracted.

## S9. The effect of photobleaching at low laser power on the Raman spectra of the IDIDs

### Experiment:

A Raman spectrum (acquisition time = 2 s) was obtained every 2.5 s over a 300 s duration and  $I_{\text{base}}$  (the intensity at  $1900\text{ cm}^{-1}$ ) extracted at each time point. The experiments were performed separately at  $\lambda = 325$  (a), 532 (b), 660 (c) and 785 nm (d).

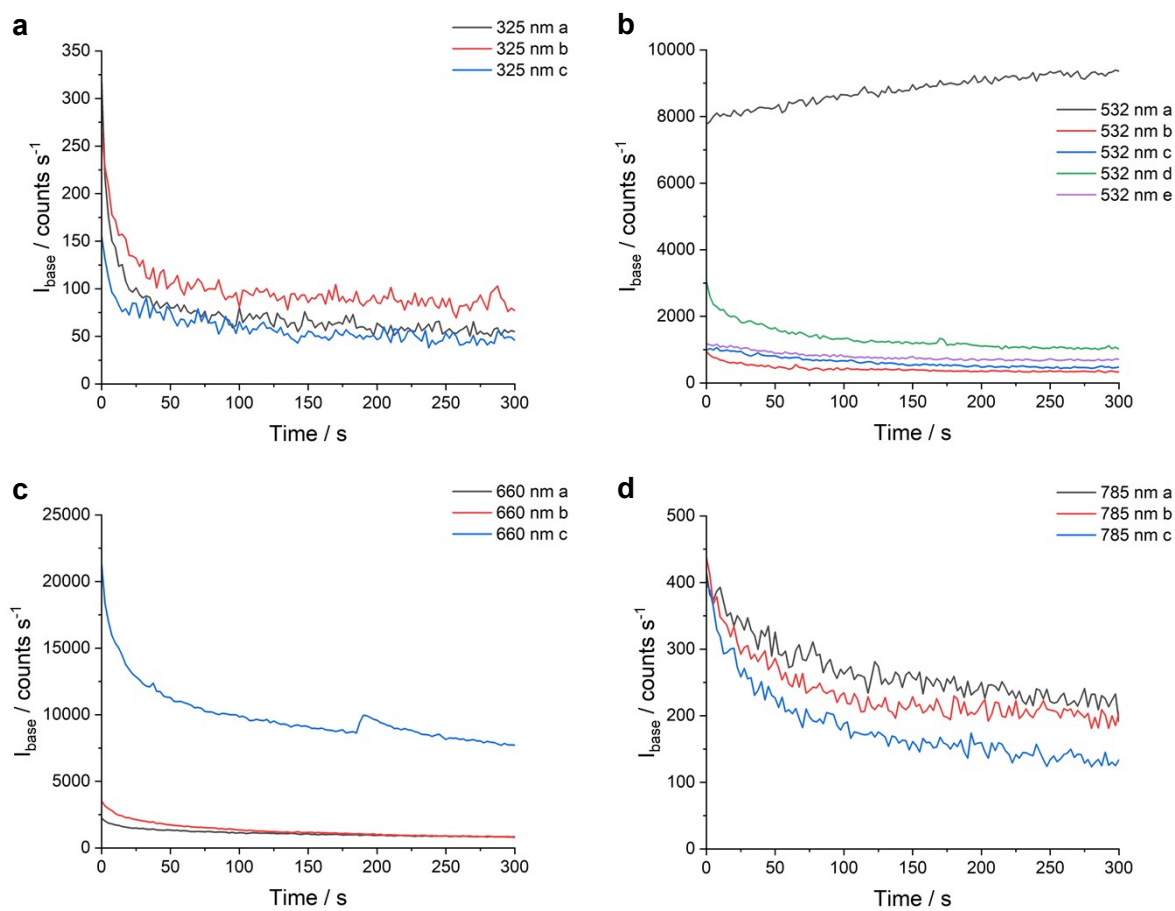

**Figure S38.** The effect of photobleaching IDID-A ( $\lambda = 325, 532, 660$  and  $785$  nm) at low power over time.

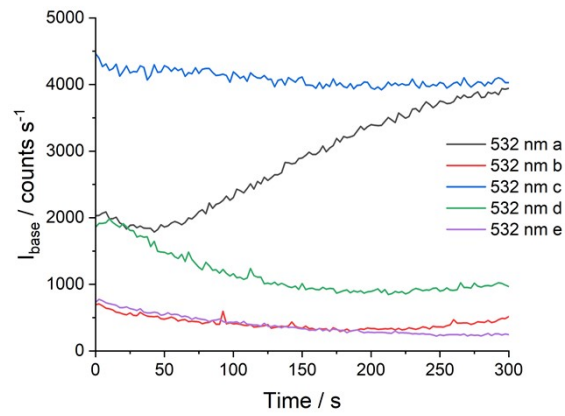

**Figure S39.** The effect of photobleaching IDID-B ( $\lambda = 532$  nm) at low power over time.

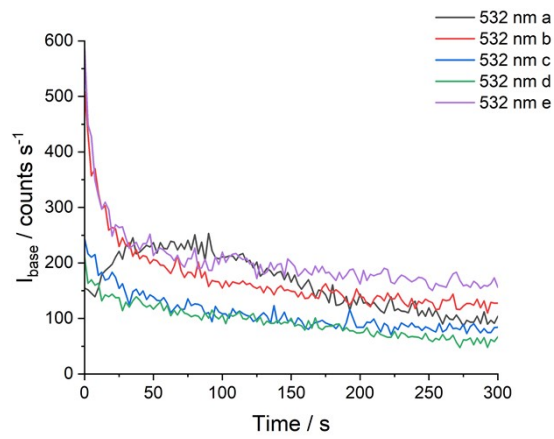

**Figure S40.** The effect of photobleaching IDID-C ( $\lambda = 532$  nm) at low power over time.

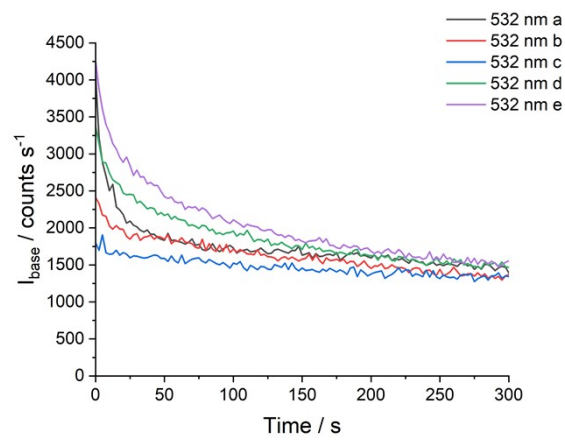

**Figure S41.** The effect of photobleaching IDID-D ( $\lambda = 532$  nm) at low power over time.

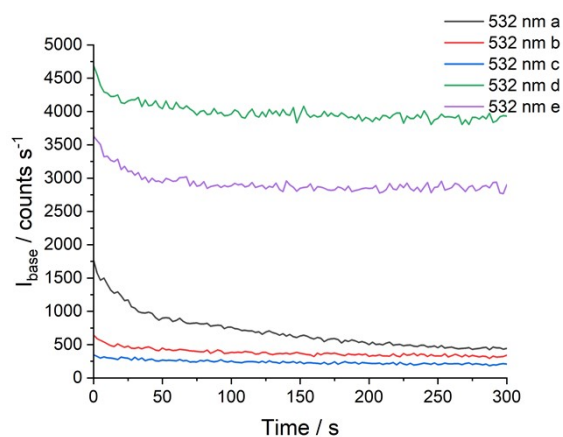

**Figure S42.** The effect of photobleaching IDID-E ( $\lambda = 532$  nm) at low power over time.

**Table S5.** Mean  $I_{\text{base}}$  plus/minus one standard deviation from N=5 measurements for  $\lambda = 532$  nm and N = 3 measurements for  $\lambda = 325, 660$  and  $785$  nm for the five IDIDs analysed by  $\mu\text{RS}$  in this study.

| IDID   | $I_{\text{base}} / \text{counts s}^{-1}$ <sup>a</sup> |                        |                        |                     |
|--------|-------------------------------------------------------|------------------------|------------------------|---------------------|
|        | 325 nm                                                | 532 nm                 | 660 nm                 | 785 nm              |
| IDID-A | 59.3<br>$\pm 15.9$                                    | 2345.6<br>$\pm 3935.7$ | 3119.7<br>$\pm 3984.6$ | 245.7<br>$\pm 76.9$ |
| IDID-B | - <sup>b</sup>                                        | 1940.9<br>$\pm 1885.5$ | - <sup>b</sup>         | - <sup>b</sup>      |
| IDID-C | - <sup>b</sup>                                        | 107.7<br>$\pm 35.3$    | - <sup>b</sup>         | - <sup>b</sup>      |
| IDID-D | - <sup>b</sup>                                        | 1424.4<br>$\pm 81.0$   | - <sup>b</sup>         | - <sup>b</sup>      |
| IDID-E | - <sup>b</sup>                                        | 1565.9<br>$\pm 1730.2$ | - <sup>b</sup>         | - <sup>b</sup>      |

<sup>a</sup>  $I_{\text{base}}$  was extracted from the final data point within the time maps, i.e., after 300 s photobleaching at  $p \leq 0.4$  mW.

<sup>b</sup> Time maps not recorded.

### Conclusions:

The multiple-wavelength, time-dependent analysis of IDID-A indicates significant fluorescence when visible ( $\lambda = 532$  and  $660$  nm) excitation laser sources are used, some of which can be removed by low-power ( $P \leq 0.4$  mW) photobleaching. However,  $I_{\text{base}}$  after 5 minutes photobleaching was still too high to enable meaningful Raman spectra to be obtained. In addition, as seen during the analysis of some of the reference samples, low-power photobleaching increases  $I_{\text{base}}$  in a small number of cases.

## S10. The effect of HyPy and NPy on the structure of the IDIDs

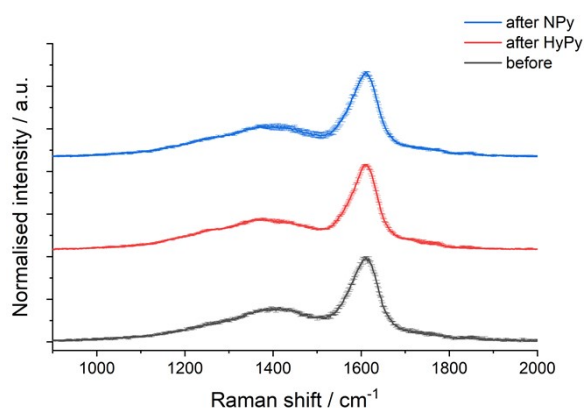

**Figure S43.** Mean Raman spectra ( $\lambda = 325$  nm) of IDID-A before treatment (black), after HyPy (red), and after NPy (blue). Error bars reflect one standard deviation from N=3 measurements. The spectra have been processed as described in the Experimental section. Prior to spectrum acquisition, IDID-A not subject to thermal treatment (i.e., before) was photobleached for 300 s at  $P = 0.3$  mW.

**Table S6.** Spectral characteristics extracted using the peak limits method from the point spectra ( $\lambda = 325$  nm) of IDID-A before treatment, after HyPy and after NPy. Values are quoted as mean plus/minus one standard deviation from N=3 measurements.

| Treatment         | $I_{\text{base}} / \text{counts s}^{-1}$ | D band                      |                          | G band                      |                          | $I_{\text{D}}:I_{\text{G}}$ |
|-------------------|------------------------------------------|-----------------------------|--------------------------|-----------------------------|--------------------------|-----------------------------|
|                   |                                          | Position / $\text{cm}^{-1}$ | Width / $\text{cm}^{-1}$ | Position / $\text{cm}^{-1}$ | Width / $\text{cm}^{-1}$ |                             |
| None <sup>a</sup> | 50.3<br>$\pm 20.8$                       | 1388.1<br>$\pm 3.1$         | 293.3<br>$\pm 6.2$       | 1608.3<br>$\pm 0.8$         | 69.6<br>$\pm 1.3$        | 0.41<br>$\pm 0.01$          |
| HyPy              | 29.0<br>$\pm 10.0$                       | 1369.0<br>$\pm 1.8$         | 317.9<br>$\pm 5.2$       | 1608.2<br>$\pm 0.3$         | 66.1<br>$\pm 0.2$        | 0.39<br>$\pm 0.00$          |
| NPy               | 29.8<br>$\pm 5.1$                        | 1375.1<br>$\pm 9.4$         | 309.4<br>$\pm 5.3$       | 1608.0<br>$\pm 1.2$         | 68.8<br>$\pm 1.2$        | 0.39<br>$\pm 0.03$          |

<sup>a</sup> Prior to spectrum acquisition, IDID-A not subject to thermal treatment (i.e., before) was photobleached for 300 s at  $P = 0.3$  mW.

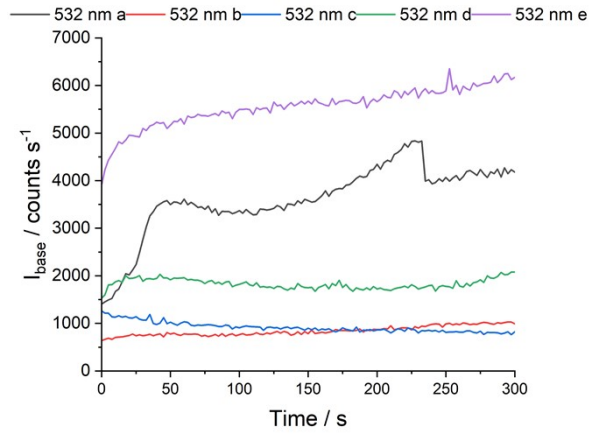

**Figure S44.** The effect of photobleaching IDID-A ( $\lambda = 532 \text{ nm}$ ) post-NPy treatment at low power over time. These measurements indicate that NPy and subsequent photobleaching are largely ineffective at removing the fluorescence which complicates analysis by  $\mu\text{RS}$ .

## S11. Fitting the Raman spectra of the IDIDs

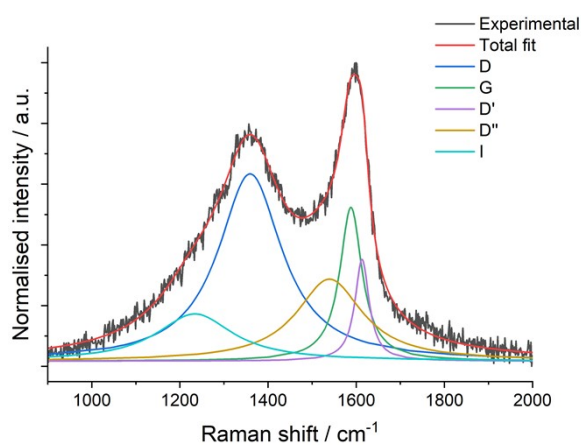

**Figure S45.** A representative Raman spectrum ( $\lambda = 532$  nm) of IDID-A following thermal treatment using HyPy. The spectra have been processed as described in the Experimental section. The D and G bands could be reasonably well described using five Lorentzian lineshapes, namely the D, G, D', D'' and I bands (reduced  $X^2 = 5.40$ ).

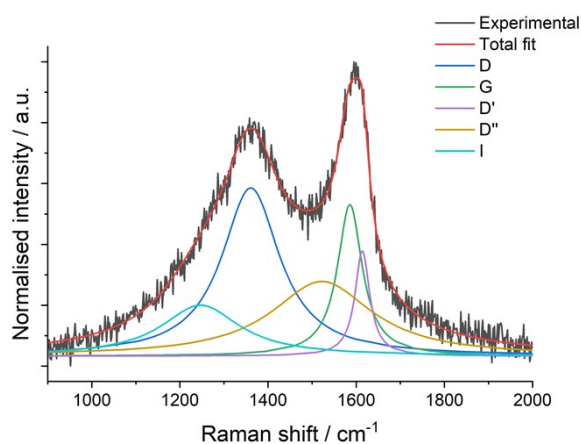

**Figure S46.** A representative Raman spectrum ( $\lambda = 532$  nm) of IDID-B following thermal treatment using HyPy. The spectra have been processed as described in the Experimental section. The D and G bands could be reasonably well described using five Lorentzian lineshapes, namely the D, G, D', D'' and I bands (reduced  $X^2 = 9.35$ ).

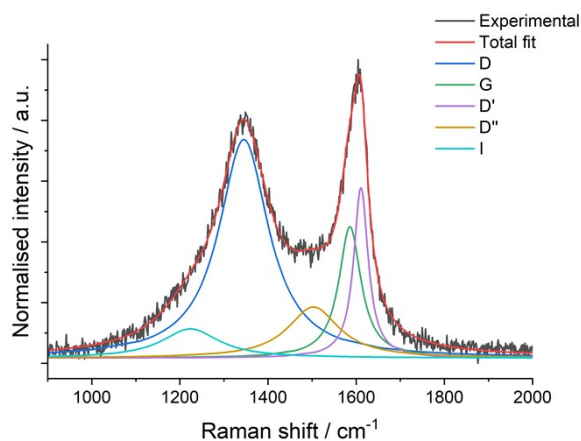

**Figure S47.** A representative Raman spectrum ( $\lambda = 532$  nm) of IDID-C following thermal treatment using HyPy. The spectra have been processed as described in the Experimental section. The D and G bands could be reasonably well described using five Lorentzian lineshapes, namely the D, G, D', D'' and I bands (reduced  $X^2 = 4.17$ ).

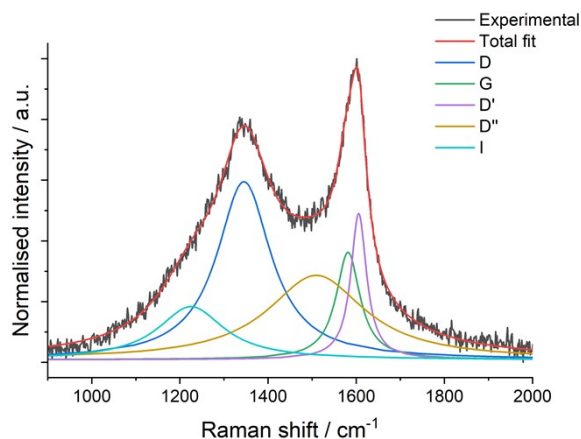

**Figure S48.** A representative Raman spectrum ( $\lambda = 532$  nm) of IDID-D following thermal treatment using HyPy. The spectra have been processed as described in the Experimental section. The D and G bands could be reasonably well described using five Lorentzian lineshapes, namely the D, G, D', D'' and I bands (reduced  $X^2 = 4.06$ ).

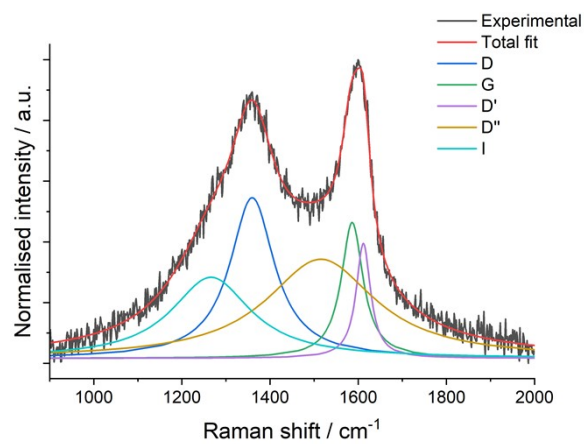

**Figure S49.** A representative Raman spectrum ( $\lambda = 532 \text{ nm}$ ) of IDID-E following thermal treatment using HyPy. The spectra have been processed as described in the Experimental section. The D and G bands could be reasonably well described using five Lorentzian lineshapes, namely the D, G, D', D'' and I bands (reduced  $X^2 = 8.02$ ).

**Table S7.** Spectral characteristics extracted using the peak fitting method from the point spectra ( $\lambda = 532$  nm) of the IDIDs after HyPy treatment investigated in this study by  $\mu$ RS. Values are quoted as mean plus/minus one standard deviation from N=5 measurements.

| IDID   | I band                      |                          | D band                      |                          | D'' band                    |                          | G band                      |                          | D' band                     |                          | $I_D:I_G$          | $A_D:A_G$          |
|--------|-----------------------------|--------------------------|-----------------------------|--------------------------|-----------------------------|--------------------------|-----------------------------|--------------------------|-----------------------------|--------------------------|--------------------|--------------------|
|        | Position / $\text{cm}^{-1}$ | Width / $\text{cm}^{-1}$ |                    |                    |
| IDID-A | 1232.2<br>$\pm 21.9$        | 187.8<br>$\pm 20.7$      | 1363.2<br>$\pm 5.7$         | 194.1 $\pm$<br>27.9      | 1543.7<br>$\pm 14.4$        | 162.6<br>$\pm 46.7$      | 1583.4<br>$\pm 3.7$         | 61.4<br>$\pm 1.4$        | 1610.3<br>$\pm 2.3$         | 43.2<br>$\pm 4.6$        | 1.40<br>$\pm 0.19$ | 4.50<br>$\pm 1.27$ |
| IDID-B | 1215.8<br>$\pm 34.8$        | 215.3<br>$\pm 40.1$      | 1357.1<br>$\pm 7.1$         | 181.8<br>$\pm 30.4$      | 1535.0<br>$\pm 19.8$        | 240.5<br>$\pm 74.5$      | 1583.1<br>$\pm 8.3$         | 69.5<br>$\pm 11.2$       | 1611.1<br>$\pm 5.1$         | 43.8<br>$\pm 5.8$        | 1.45<br>$\pm 0.19$ | 3.94<br>$\pm 1.40$ |
| IDID-C | 1194.9<br>$\pm 19.4$        | 186.6<br>$\pm 19.0$      | 1344.5<br>$\pm 1.2$         | 154.5<br>$\pm 15.7$      | 1507.8<br>$\pm 5.9$         | 136.9<br>$\pm 21.5$      | 1580.1<br>$\pm 7.0$         | 64.2<br>$\pm 4.3$        | 1607.0<br>$\pm 3.9$         | 45.7<br>$\pm 6.7$        | 1.98<br>$\pm 0.58$ | 4.78<br>$\pm 1.49$ |
| IDID-D | 1231.5<br>$\pm 8.4$         | 196.2<br>$\pm 16.9$      | 1347.5<br>$\pm 2.3$         | 149.3<br>$\pm 7.5$       | 1505.6<br>$\pm 8.0$         | 136.9<br>$\pm 21.5$      | 1578.4<br>$\pm 5.2$         | 70.5<br>$\pm 7.1$        | 1605.5<br>$\pm 1.7$         | 70.5<br>$\pm 7.1$        | 1.71<br>$\pm 0.18$ | 3.64<br>$\pm 0.45$ |
| IDID-E | 1253.3<br>$\pm 21.0$        | 192.8<br>$\pm 33.8$      | 1357.5<br>$\pm 2.6$         | 144.5<br>$\pm 22.2$      | 1521.4<br>$\pm 18.7$        | 271.4<br>$\pm 39.7$      | 1584.4<br>$\pm 3.3$         | 60.5<br>$\pm 3.1$        | 1610.8<br>$\pm 2.2$         | 41.6<br>$\pm 5.1$        | 1.45<br>$\pm 0.39$ | 3.57<br>$\pm 1.58$ |

## S12. Other IDIDs studied

**Table S8.** Technical details of the IDIDs analysed by GC-MS in this study, including the location engine component failed, the fuel used and the quoted complaint. CARB = Californian Air Resources Board. ULSD = Ultra-low sulphur diesel. PIBSI = Polyisobutylene succinimide.

| <b>IDID</b> | <b>Location</b>   | <b>Fuel</b>                          | <b>Complaint</b>                                                                     |
|-------------|-------------------|--------------------------------------|--------------------------------------------------------------------------------------|
| IDID-F      | California        | CARB diesel                          | The complaint was the engine not starting.                                           |
| IDID-G      | Illinois          | ULSD                                 | The complaint was insufficient power, later identified by the injector being stuck.  |
| IDID-H      | DW10B engine test | RF06 with low molecular weight PIBSI | After 16 hours testing, there was a severe failure due to the injector being jammed. |
| IDID-I      | Mid-west USA      | ULSD                                 | The complaint was drivability issues, later identified by the injector being stuck.  |
| IDID-J      | Norway            | EN590                                | The complaint was failure to start due to a stuck injector.                          |
